# Supplementary material
Source: PubMed Central journal article supplement (PMC4511833)
Supplement: NIHMS63643-supplement-1.pdf [file NIHMS63643-supplement-1.pdf]

*Supplementary information to the paper*

**Pharmacological targeting of the Wdr5-MLL interaction in C/EBP $\alpha$**

**N-terminal leukemia**

Florian Grebien<sup>1,2\*§</sup>, Masoud Vedadi<sup>3,4\*</sup>, Matthäus Getlik<sup>5\*</sup>, Roberto Giambruno<sup>1</sup>, Amit Grover<sup>6</sup>, Roberto Avellino<sup>7</sup>, Anna Skucha<sup>1</sup>, Sarah Vittori<sup>1</sup>, Ekaterina Kuznetsova<sup>3</sup>, David Smil<sup>3</sup>, Dalia Barsyte-Lovejoy<sup>3</sup>, Fengling Li<sup>3</sup>, Gennadiy Poda<sup>5,8</sup>, Matthieu Schapira<sup>3,4</sup>, Hong Wu<sup>3</sup>, Aiping Dong<sup>3</sup>, Guillermo Senisterra<sup>3</sup>, Alexey Stukalov<sup>1</sup>, Kilian V. M. Huber<sup>1</sup>, Andreas Schönegger<sup>1</sup>, Richard Marcellus<sup>5</sup>, Martin Bilban<sup>9</sup>, Christoph Bock<sup>1</sup>, Peter J. Brown<sup>3</sup>, Johannes Zuber<sup>10</sup>, Keiryn L. Bennett<sup>1</sup>, Rima Al-awar<sup>4,5</sup>, Ruud Delwel<sup>7</sup>, Claus Nerlov<sup>6</sup>, Cheryl H. Arrowsmith<sup>3,11\*§</sup> and Giulio Superti-Furga<sup>1\*§</sup>

<sup>1</sup> CeMM Research Center for Molecular Medicine of the Austrian Academy of Sciences, Vienna 1090, Austria

<sup>2</sup> Ludwig Boltzmann Institute for Cancer Research, Vienna 1090, Austria

<sup>3</sup> Structural Genomics Consortium, University of Toronto, Toronto, ON, M5G 1L7, Canada

<sup>4</sup> Department of Pharmacology and Toxicology, University of Toronto, Toronto, ON, M5S 1A8, Canada

<sup>5</sup> Drug Discovery Program, Ontario Institute for Cancer Research, Toronto, ON, M5G 0A3, Canada

<sup>6</sup> MRC Molecular Hematology Unit, Weatherall Institute of Molecular Medicine, Oxford OX3 9DS, United Kingdom

<sup>7</sup> Department of Hematology, Erasmus University Medical Center, Rotterdam 3015 GE, The Netherlands

<sup>8</sup> Leslie Dan Faculty of Pharmacy, University of Toronto, Toronto, ON, M5S 3M2, Canada

<sup>9</sup> Clinical Institute of Medical and Chemical Laboratory Diagnostics, Medical University Vienna, Vienna 1090, Austria

<sup>10</sup> Research Institute of Molecular Pathology (IMP), Vienna 1030, Austria

<sup>11</sup> Princess Margaret Cancer Centre and Department of Medical Biophysics, University of Toronto, Toronto, ON, M5G 2M9, Canada

\* equal contribution

§ correspondence to

Giulio Superti-Furga: [gsuperti@cemm.oeaw.ac.at](mailto:gsuperti@cemm.oeaw.ac.at), phone: +43-1-40160-70001

Cheryl H Arrowsmith: [carrow@uhnresearch.ca](mailto:carrow@uhnresearch.ca), phone: +1-416-946-0881

Florian Grebien: [florian.grebien@lbicr.lbg.ac.at](mailto:florian.grebien@lbicr.lbg.ac.at), phone: +43-1-40160-71240

## ***Supplementary Results***

***Supplementary Tables 1-7***

***Supplementary Figures 1-16***

***Full, uncut gel images for Figures 1, 5 and Supplementary Figures 2, 5, 8 and 13.***

Supplementary Table 1. Summary of LC-MS/MS data of C/EBP $\alpha$  p42 AP-MS experiments in FDCP-1 cells.

| Gene_symbol | Description                                                             | SP_GN                   | PeptideCl_mock | Mean_PeptideCl_mock | PeptideCl_p42 | Mean_PeptideCl_p42 | SpectraCl_mock | Mean_SpectraCl_mock | SpectraCl_p42 | Mean_SpectraCl_p42 | Setcov_mock | Mean_Setcov_mock | Setcov_p42 | Mean_Setcov_p42 |
|-------------|-------------------------------------------------------------------------|-------------------------|----------------|---------------------|---------------|--------------------|----------------|---------------------|---------------|--------------------|-------------|------------------|------------|-----------------|
| Top2a       | DNA topoisomerase 2-alpha                                               | Top2a_Top2_Top-2        | 10             | 7.5                 | 24            | 18.5               | 15             | 7.5                 | 42            | 21                 | 0.07        | 0.06             | 0.16       | 0.13            |
| Hnrnpu2     | Heterogeneous nuclear ribonucleoprotein U-like protein                  | Hnrnpu2_Hnrnpu2_Manp    | 7              | 4.5                 | 19            | 13.5               | 9              | 4.5                 | 31            | 15.5               | 0.09        | 0.06             | 0.22       | 0.16            |
| Nop56       | Nucleolar protein 56                                                    | Nop56_Nol5a             | 4              | 2                   | 15            | 12.5               | 4              | 2                   | 31            | 15.5               | 0.07        | 0.04             | 0.26       | 0.22            |
| Pdcd11      | Protein RRP5 homolog                                                    | Pdcd11_Alg4_Kiaa0185    | 0              | 0                   | 14            | 13                 | 0              | 0                   | 26            | 13                 | 0           | 0                | 0.08       | 0.07            |
| Myh9        | Myosin-9                                                                | Myh9                    | 0              | 0                   | 14            | 10                 | 0              | 0                   | 22            | 11                 | 0           | 0                | 0.08       | 0.06            |
| Eif4a3      | Eukaryotic initiation factor 4A-III                                     | Eif4a3_Ddx48            | 8              | 4                   | 13            | 11                 | 8              | 4                   | 22            | 11                 | 0.17        | 0.09             | 0.23       | 0.2             |
| Hp1bp3      | Heterochromatin protein 1-binding protein 3                             | Hp1bp3                  | 3              | 1.5                 | 11            | 9                  | 3              | 1.5                 | 29            | 14.5               | 0.06        | 0.03             | 0.2        | 0.16            |
| Nat10       | N-acetyltransferase 10                                                  | Nat10_Kiaa1709          | 2              | 1                   | 10            | 7.5                | 2              | 1                   | 15            | 7.5                | 0.02        | 0.01             | 0.1        | 0.08            |
| Rpn1        | Dolichyl-diphosphooligosaccharide-protein glycosyltransferase 1         | Rpn1                    | 2              | 1                   | 9             | 7.5                | 2              | 1                   | 15            | 7.5                | 0.04        | 0.02             | 0.16       | 0.14            |
| Nop58       | Nucleolar protein 58                                                    | Nop58_Nol5              | 2              | 1.5                 | 9             | 5.5                | 5              | 2.5                 | 16            | 8                  | 0.04        | 0.03             | 0.18       | 0.11            |
| Nol6        | Nucleolar protein 6                                                     | Nol6                    | 0              | 0                   | 9             | 5.5                | 0              | 0                   | 12            | 6                  | 0           | 0                | 0.07       | 0.05            |
| Acin1       | Apoptotic chromatin condensation inducer in the nucleus                 | Acin1_Acinus            | 2              | 1                   | 7             | 5.5                | 2              | 1                   | 14            | 7                  | 0.02        | 0.01             | 0.06       | 0.04            |
| Ddx18       | ATP-dependent RNA helicase DDX18                                        | Ddx18                   | 2              | 1.5                 | 8             | 7.5                | 3              | 1.5                 | 19            | 9.5                | 0.03        | 0.02             | 0.12       | 0.12            |
| NA          | rat CEBPA Strep-HA protein                                              | NA                      | 0              | 0                   | 7             | 6                  | 0              | 0                   | 19            | 9.5                | 0           | 0                | 0.16       | 0.14            |
| Matr3       | Matrin-3                                                                | Matr3                   | 0              | 0                   | 7             | 5.5                | 0              | 0                   | 11            | 5.5                | 0           | 0                | 0.09       | 0.07            |
| Noc21       | Nucleolar complex protein 2 homolog                                     | Noc21                   | 0              | 0                   | 7             | 5.5                | 0              | 0                   | 13            | 6.5                | 0           | 0                | 0.07       | 0.06            |
| Nup93       | Nuclear pore complex protein Nup93                                      | Nup93_Kiaa0095_Cip4     | 0              | 0                   | 7             | 4.5                | 0              | 0                   | 9             | 4.5                | 0           | 0                | 0.09       | 0.06            |
| Mogs        | Mannosyl-oligosaccharide glucosidase                                    | Mogs_Gcs1               | 0              | 0                   | 6             | 3.5                | 0              | 0                   | 7             | 3.5                | 0           | 0                | 0.07       | 0.04            |
| Zfr         | Zinc finger RNA-binding protein                                         | Zfr                     | 1              | 0.5                 | 6             | 5.5                | 1              | 0.5                 | 13            | 6.5                | 0.02        | 0.01             | 0.07       | 0.06            |
| Ddx47       | Probable ATP-dependent RNA helicase DDX47                               | Ddx47                   | 1              | 0.5                 | 5             | 3                  | 1              | 0.5                 | 6             | 3                  | 0.02        | 0.01             | 0.12       | 0.07            |
| Baz1a       | Bromodomain adjacent to zinc finger domain protein 1A                   | Baz1a_Cbp146            | 1              | 0.5                 | 6             | 4.5                | 1              | 0.5                 | 14            | 7                  | 0.01        | 0                | 0.04       | 0.03            |
| Lmnb1       | Lamin-B1                                                                | Lmnb1                   | 2              | 1                   | 6             | 5.5                | 2              | 1                   | 11            | 5.5                | 0.04        | 0.02             | 0.11       | 0.1             |
| Srsf5       | Serine/arginine-rich splicing factor 5                                  | Srsf5_Sfrs5_Hrs         | 2              | 2                   | 5             | 4                  | 7              | 3.5                 | 21            | 10.5               | 0.09        | 0.09             | 0.17       | 0.14            |
| Mta2        | Metastasis-associated protein MTA2                                      | Mta2_Mta11              | 0              | 0                   | 5             | 3.5                | 0              | 0                   | 7             | 3.5                | 0           | 0                | 0.07       | 0.05            |
| Hdac2       | Histone deacetylase 2                                                   | Hdac2_Yy1bp             | 3              | 2                   | 5             | 4.5                | 4              | 2                   | 9             | 4.5                | 0.07        | 0.04             | 0.09       | 0.09            |
| Hdac1       | Histone deacetylase 1                                                   | Hdac1                   | 0              | 0                   | 5             | 4                  | 0              | 0                   | 8             | 4                  | 0           | 0                | 0.1        | 0.08            |
| Snmp70      | U1 small nuclear ribonucleoprotein 70 kDa                               | Snmp70_Snmp70           | 0              | 0                   | 5             | 3.5                | 0              | 0                   | 8             | 4                  | 0           | 0                | 0.1        | 0.07            |
| Rbm39       | RNA-binding protein 39                                                  | Rbm39_Rnpc2_Caper       | 0              | 0                   | 5             | 3.5                | 0              | 0                   | 8             | 4                  | 0           | 0                | 0.11       | 0.08            |
| Lbr         | Lamin-B receptor                                                        | Lbr                     | 0              | 0                   | 4             | 2                  | 0              | 0                   | 4             | 2                  | 0           | 0                | 0.06       | 0.03            |
| Rpn2        | Dolichyl-diphosphooligosaccharide-protein glycosyltransferase 2         | Rpn2                    | 0              | 0                   | 4             | 2.5                | 0              | 0                   | 5             | 2.5                | 0           | 0                | 0.08       | 0.05            |
| Usp39       | U4/U6/U5 tri-snRNP-associated protein 2                                 | Usp39                   | 0              | 0                   | 4             | 2                  | 0              | 0                   | 4             | 2                  | 0           | 0                | 0.07       | 0.04            |
| Mcm4        | DNA replication licensing factor MCM4                                   | Mcm4_Cdc21_Mcmd4        | 0              | 0                   | 4             | 2                  | 0              | 0                   | 4             | 2                  | 0           | 0                | 0.05       | 0.02            |
| Rrp1b       | Ribosomal RNA processing protein 1 homolog B                            | Rrp1b                   | 1              | 0.5                 | 4             | 4                  | 1              | 0.5                 | 9             | 4.5                | 0.02        | 0.01             | 0.07       | 0.07            |
| Urb1        | Nucleolar pre-ribosomal-associated protein 1                            | Urb1_Npa1_Kiaa0539      | 0              | 0                   | 4             | 3.5                | 0              | 0                   | 7             | 3.5                | 0           | 0                | 0.02       | 0.02            |
| Pnn         | Pinin                                                                   | Pnn                     | 0              | 0                   | 4             | 3.5                | 0              | 0                   | 7             | 3.5                | 0           | 0                | 0.06       | 0.05            |
| Ints7       | Integrator complex subunit 7                                            | Ints7                   | 0              | 0                   | 4             | 2                  | 0              | 0                   | 4             | 2                  | 0           | 0                | 0.05       | 0.02            |
| Sap18       | Histone deacetylase complex subunit SAP18                               | Sap18                   | 0              | 0                   | 4             | 2                  | 0              | 0                   | 4             | 2                  | 0           | 0                | 0.18       | 0.09            |
| Smarca1     | SWI/SNF-related matrix-associated actin-dependent regulator 1 subunit 1 | Smarca1_D15Kz1_Baf60a   | 0              | 0                   | 4             | 2.5                | 0              | 0                   | 5             | 2.5                | 0           | 0                | 0.09       | 0.05            |
| Cebpz       | CCAAT/enhancer-binding protein zeta                                     | Cebpz_Cebpz-rs1_Cbf2    | 0              | 0                   | 4             | 2                  | 0              | 0                   | 4             | 2                  | 0           | 0                | 0.04       | 0.02            |
| Srsf3       | Serine/arginine-rich splicing factor 3                                  | Srsf3_X16_Sfrs3_Srp20   | 1              | 0.5                 | 2             | 2                  | 1              | 0.5                 | 4             | 2                  | 0.09        | 0.04             | 0.07       | 0.07            |
| Nup160      | Nuclear pore complex protein Nup160                                     | Nup160_Gt1-13_Kiaa0197  | 0              | 0                   | 3             | 3                  | 0              | 0                   | 6             | 3                  | 0           | 0                | 0.02       | 0.02            |
| Lig3        | DNA ligase 3                                                            | Lig3                    | 1              | 0.5                 | 3             | 2                  | 1              | 0.5                 | 4             | 2                  | 0.01        | 0                | 0.03       | 0.02            |
| Rps25       | 40S ribosomal protein S25                                               | Rps25                   | 0              | 0                   | 3             | 2                  | 0              | 0                   | 4             | 2                  | 0           | 0                | 0.21       | 0.14            |
| Kiaa0020    | Pumilio domain-containing protein KIAA0020                              | Kiaa0020_D19Bw1357e     | 0              | 0                   | 3             | 2.5                | 0              | 0                   | 5             | 2.5                | 0           | 0                | 0.04       | 0.04            |
| Sin3a       | Paired amphipathic helix protein Sin3a                                  | Sin3a_Kiaa4126          | 1              | 0.5                 | 3             | 2.5                | 1              | 0.5                 | 6             | 3                  | 0.01        | 0                | 0.03       | 0.02            |
| Gnb2        | Guanine nucleotide-binding protein G(I)/G(S)/G(T) subunit 2             | Gnb2                    | 0              | 0                   | 3             | 2                  | 0              | 0                   | 4             | 2                  | 0           | 0                | 0.1        | 0.06            |
| Stag1       | Cohesin subunit SA-1                                                    | Stag1_Sa1               | 1              | 0.5                 | 3             | 2.5                | 1              | 0.5                 | 5             | 2.5                | 0.01        | 0                | 0.03       | 0.02            |
| Rrp12       | RRP12-like protein                                                      | Rrp12_Kiaa0690          | 0              | 0                   | 3             | 2.5                | 0              | 0                   | 5             | 2.5                | 0           | 0                | 0.02       | 0.02            |
| Ewsr1       | RNA-binding protein EWS                                                 | Ewsr1_Ewsh_Ews          | 1              | 1                   | 3             | 2.5                | 4              | 2                   | 6             | 3                  | 0.02        | 0.05             | 0.06       | 0.05            |
| Folr2a      | DNA-directed RNA polymerase II subunit RPB1                             | Folr2a_Rpl215_Rpo2-1    | 0              | 0                   | 3             | 2.5                | 0              | 0                   | 5             | 2.5                | 0           | 0                | 0.01       | 0.01            |
| Eif2s1      | Eukaryotic translation initiation factor 2 subunit 1                    | Eif2s1_Eif2s1           | 0              | 0                   | 3             | 2                  | 0              | 0                   | 4             | 2                  | 0           | 0                | 0.09       | 0.07            |
| Nol10       | Nucleolar protein 10                                                    | Nol10_Gm67              | 0              | 0                   | 2             | 2                  | 0              | 0                   | 4             | 2                  | 0           | 0                | 0.03       | 0.03            |
| Rps9        | 40S ribosomal protein S9                                                | Rps9                    | 0              | 0                   | 2             | 2                  | 0              | 0                   | 4             | 2                  | 0           | 0                | 0.09       | 0.09            |
| H2afz       | Histone H2A.Z                                                           | H2afz_H2az              | 0              | 0                   | 2             | 2                  | 0              | 0                   | 4             | 2                  | 0           | 0                | 0.12       | 0.12            |
| Fts3        | Putative RNA methyltransferase 3                                        | Fts3                    | 0              | 0                   | 2             | 2                  | 0              | 0                   | 5             | 2.5                | 0           | 0                | 0.02       | 0.02            |
| Ddx54       | ATP-dependent RNA helicase DDX54                                        | Ddx54                   | 0              | 0                   | 2             | 2                  | 0              | 0                   | 4             | 2                  | 0           | 0                | 0.02       | 0.02            |
| Rps14       | 40S ribosomal protein S14                                               | Rps14                   | 0              | 0                   | 2             | 2                  | 0              | 0                   | 4             | 2                  | 0           | 0                | 0.16       | 0.16            |
| Ddit3       | DNA damage-inducible transcript 3 protein                               | Ddit3_Gadd153_Chop_Chop | 0              | 0                   | 2             | 2                  | 0              | 0                   | 7             | 3.5                | 0           | 0                | 0.07       | 0.07            |
| Ppp2r1a     | Serine/threonine-protein phosphatase 2A 65 kDa regulator 1              | Ppp2r1a                 | 0              | 0                   | 2             | 2                  | 0              | 0                   | 4             | 2                  | 0           | 0                | 0.04       | 0.04            |
| NA          | Cell cycle regulator Mat89Bb homolog                                    | NA                      | 0              | 0                   | 2             | 2                  | 0              | 0                   | 4             | 2                  | 0           | 0                | 0.03       | 0.03            |
| Rpl27       | 60S ribosomal protein L27                                               | Rpl27                   | 1              | 0.5                 | 2             | 2                  | 1              | 0.5                 | 4             | 2                  | 0.07        | 0.03             | 0.12       | 0.12            |
| Myh6        | Myosin light polypeptide 6                                              | Myh6_Myln               | 1              | 0.5                 | 2             | 2                  | 1              | 0.5                 | 4             | 2                  | 0.09        | 0.04             | 0.15       | 0.15            |
| Kpnb1       | Importin subunit beta-1                                                 | Kpnb1_Impnb             | 0              | 0                   | 2             | 2                  | 0              | 0                   | 4             | 2                  | 0           | 0                | 0.02       | 0.02            |
| Hdgfrp2     | Hepatoma-derived growth factor-related protein 2                        | Hdgfrp2                 | 0              | 0                   | 2             | 2                  | 0              | 0                   | 4             | 2                  | 0           | 0                | 0.03       | 0.03            |

Supplementary Table 2. Summary of LC-MS/MS data of C/EBP $\alpha$  p30 AP-MS experiments in FDCP-1 cells.

| Gene_symbol | Description                                                                                   | SP - CN                        | PeptideCT_mock | Mean_PeptideCT_mock | PeptideCT_p30 | Mean_PeptideCT_p30 | SpectralCT_mock | Mean_SpectralCT_mock | SpectralCT_p30 | Mean_SpectralCT_p30 | Seqcov_mock | Mean_Seqcov_mock | Seqcov_p30 | Mean_Seqcov_p30 |
|-------------|-----------------------------------------------------------------------------------------------|--------------------------------|----------------|---------------------|---------------|--------------------|-----------------|----------------------|----------------|---------------------|-------------|------------------|------------|-----------------|
| Sptbn1      | Spectrin beta chain, brain 1                                                                  | Sptbn1,Sptb2,Elf.Sptnb-2,Sptnb | 3              | 1                   | 23            | 12.5               | 3               | 1                    | 25             | 12.5                | 0.02        | 0.01             | 0.11       | 0.06            |
| Top1        | DNA topoisomerase 1                                                                           | Top1,Top-1                     | 13             | 7.33                | 22            | 18                 | 31              | 10.33                | 63             | 31.5                | 0.17        | 0.09             | 0.28       | 0.24            |
| Hnmpm       | Heterogeneous nuclear ribonucleoprotein M                                                     | Hnmpm,Hnmpm                    | 8              | 4.33                | 19            | 12                 | 15              | 5                    | 40             | 20                  | 0.11        | 0.06             | 0.28       | 0.18            |
| Sptan1      | Spectrin alpha chain, brain                                                                   | Sptan1,Spta2,Spna2             | 3              | 1                   | 18            | 9                  | 3               | 1                    | 19             | 9.5                 | 0.01        | 0                | 0.08       | 0.04            |
| Hspa5       | 78 kDa glucose-regulated protein                                                              | Hspa5,Grp78                    | 4              | 2.33                | 12            | 8.5                | 13              | 4.33                 | 24             | 12                  | 0.08        | 0.05             | 0.25       | 0.18            |
| Ddx18       | ATP-dependent RNA helicase DDX18                                                              | Ddx18                          | 3              | 1.33                | 12            | 7.5                | 4               | 1.33                 | 18             | 9                   | 0.05        | 0.02             | 0.2        | 0.12            |
| Hp1bp3      | Heterochromatin protein 1-binding protein 3                                                   | Hp1bp3                         | 5              | 1.67                | 9             | 7.5                | 5               | 1.67                 | 22             | 11                  | 0.11        | 0.04             | 0.17       | 0.14            |
| Rps3        | 40S ribosomal protein S3                                                                      | Rps3                           | 2              | 1.33                | 10            | 7                  | 4               | 1.33                 | 18             | 9                   | 0.11        | 0.07             | 0.47       | 0.32            |
| Irs7        | Integrator complex subunit 7                                                                  | Irs7                           | 0              | 0                   | 10            | 5                  | 0               | 0                    | 0              | 0                   | 0           | 0                | 0.13       | 0.06            |
| Rps4x       | 40S ribosomal protein S4, X isoform                                                           | Rps4x,Rps4                     | 5              | 1.67                | 9             | 6                  | 5               | 1.67                 | 16             | 8                   | 0.21        | 0.07             | 0.33       | 0.24            |
| Vcp         | Transitional endoplasmic reticulum ATPase                                                     | Vcp                            | 4              | 1.33                | 7             | 6                  | 4               | 1.33                 | 13             | 6.5                 | 0.07        | 0.02             | 0.1        | 0.09            |
| Thoc5       | THO complex subunit 5 homolog                                                                 | Thoc5,Kiaa0983,Fmpip           | 2              | 1.33                | 8             | 5                  | 4               | 1.33                 | 12             | 6                   | 0.03        | 0.02             | 0.13       | 0.08            |
| Smu1        | WD40 repeat-containing protein SMU1                                                           | Smu1                           | 2              | 1.67                | 6             | 4                  | 5               | 1.67                 | 14             | 7                   | 0.05        | 0.05             | 0.16       | 0.11            |
| Thoc1       | THO complex subunit 1                                                                         | Thoc1,Hpr1                     | 3              | 1                   | 7             | 6                  | 3               | 1                    | 12             | 6                   | 0.05        | 0.02             | 0.13       | 0.11            |
| Nup93       | Nuclear pore complex protein Nup93                                                            | Nup93,Kiaa0095,Cip4            | 0              | 0                   | 7             | 4                  | 0               | 0                    | 8              | 4                   | 0           | 0                | 0.11       | 0.06            |
| Srsf5       | Serine/arginine-rich splicing factor 5                                                        | Srsf5,Srsf5,Hrs                | 2              | 2                   | 6             | 4                  | 11              | 3.67                 | 20             | 10                  | 0.09        | 0.09             | 0.23       | 0.16            |
| D1Pas1      | Putative ATP-dependent RNA helicase P110                                                      | D1Pas1,P110                    | 1              | 0.33                | 6             | 4.5                | 1               | 0.33                 | 11             | 5.5                 | 0.02        | 0.01             | 0.12       | 0.08            |
| Ppp1ca      | Serine/threonine-protein phosphatase PP1-alpha catalytic subunit                              | Ppp1ca,Ppp1a                   | 1              | 0.33                | 6             | 3                  | 1               | 0.33                 | 7              | 3.5                 | 0.04        | 0.01             | 0.24       | 0.12            |
| Ogt         | UDP-N-acetylglucosamine-peptide N-acetylglucosaminyltransferase 1                             | Ogt                            | 0              | 0                   | 6             | 3.5                | 0               | 0                    | 7              | 3.5                 | 0           | 0                | 0.06       | 0.03            |
| Mcm7        | DNA replication licensing factor MCM7                                                         | Mcm7,Cdc47,Mcmd7               | 1              | 0.67                | 6             | 4                  | 2               | 0.67                 | 8              | 4                   | 0.02        | 0.01             | 0.1        | 0.07            |
| Rfc2        | Replication factor C subunit 2                                                                | Rfc2                           | 1              | 0.33                | 6             | 4                  | 1               | 0.33                 | 8              | 4                   | 0.04        | 0.01             | 0.23       | 0.16            |
| Mcm4        | DNA replication licensing factor MCM4                                                         | Mcm4,Cdc21,Mcmd4               | 0              | 0                   | 5             | 2.5                | 0               | 0                    | 5              | 2.5                 | 0           | 0                | 0.07       | 0.04            |
| Zfr         | Zinc finger RNA-binding protein                                                               | Zfr                            | 1              | 0.33                | 5             | 2.5                | 1               | 0.33                 | 5              | 2.5                 | 0.02        | 0.01             | 0.06       | 0.03            |
| Ddx47       | Probable ATP-dependent RNA helicase DDX47                                                     | Ddx47                          | 1              | 0.33                | 5             | 3.5                | 1               | 0.33                 | 7              | 3.5                 | 0.02        | 0.01             | 0.13       | 0.09            |
| Gzmb        | Granzyme B(G,H)                                                                               | Gzmb,Ctla1,Ctla-1              | 0              | 0                   | 5             | 2.5                | 0               | 0                    | 6              | 3                   | 0           | 0                | 0.15       | 0.08            |
| Nup160      | Nuclear pore complex protein Nup160                                                           | Nup160,Gtf1-13,Kiaa0197        | 0              | 0                   | 4             | 2                  | 0               | 0                    | 4              | 2                   | 0           | 0                | 0.03       | 0.01            |
| Dot         | Lipoamide acyltransferase component of branched-chain amino acid aminotransferase             | Dot                            | 0              | 0                   | 4             | 2                  | 0               | 0                    | 4              | 2                   | 0           | 0                | 0.09       | 0.04            |
| Rfc3        | Replication factor C subunit 3                                                                | Rfc3                           | 0              | 0                   | 4             | 2                  | 0               | 0                    | 4              | 2                   | 0           | 0                | 0.13       | 0.06            |
| Prpf4       | U4/U6 small nuclear ribonucleoprotein Prp4                                                    | Prpf4                          | 0              | 0                   | 4             | 2.5                | 0               | 0                    | 5              | 2.5                 | 0           | 0                | 0.07       | 0.06            |
| NA          | rat CEBPA Strep-HA protein                                                                    | NA                             | 0              | 0                   | 4             | 3.5                | 0               | 0                    | 12             | 6                   | 0           | 0                | 0.09       | 0.08            |
| Safb2       | Scaffold attachment factor B2                                                                 | Safb2                          | 1              | 0.33                | 4             | 2                  | 1               | 0.33                 | 6              | 3                   | 0.01        | 0                | 0.06       | 0.03            |
| Smarcd2     | SWI/SNF-related matrix-associated actin-dependent regulator of chromatin subfamily 2 member B | Smarcd2,Baf60b                 | 0              | 0                   | 4             | 2                  | 0               | 0                    | 4              | 2                   | 0           | 0                | 0.1        | 0.05            |
| Nup107      | Nuclear pore complex protein Nup107                                                           | Nup107                         | 0              | 0                   | 4             | 3                  | 0               | 0                    | 6              | 3                   | 0           | 0                | 0.05       | 0.03            |
| Wtap        | Pre-mRNA-splicing regulator WTAP                                                              | Wtap                           | 0              | 0                   | 4             | 2                  | 0               | 0                    | 4              | 2                   | 0           | 0                | 0.13       | 0.06            |
| Med23       | Mediator of RNA polymerase II transcription subunit 23                                        | Med23,Kiaa1216,Crsp3,Sur2      | 0              | 0                   | 4             | 2                  | 0               | 0                    | 4              | 2                   | 0           | 0                | 0.03       | 0.02            |
| NA          | Ig kappa chain C region                                                                       | NA                             | 0              | 0                   | 4             | 2                  | 0               | 0                    | 16             | 8                   | 0           | 0                | 0.39       | 0.19            |
| Ppp1cb      | Serine/threonine-protein phosphatase PP1-beta catalytic subunit                               | Ppp1cb                         | 1              | 0.33                | 4             | 2                  | 1               | 0.33                 | 4              | 2                   | 0.04        | 0.01             | 0.17       | 0.08            |
| Ncoa5       | Nuclear receptor coactivator 5                                                                | Ncoa5                          | 0              | 0                   | 4             | 2.5                | 0               | 0                    | 7              | 3.5                 | 0           | 0                | 0.11       | 0.07            |
| Bub3        | Mitotic checkpoint protein BUB3                                                               | Bub3                           | 0              | 0                   | 4             | 2                  | 0               | 0                    | 4              | 2                   | 0           | 0                | 0.18       | 0.08            |
| Tcerg1      | Transcription elongation regulator 1                                                          | Tcerg1,Taf2a                   | 0              | 0                   | 4             | 2.5                | 0               | 0                    | 5              | 2.5                 | 0           | 0                | 0.04       | 0.02            |
| Kpnb1       | Importin subunit beta-1                                                                       | Kpnb1,Impnb                    | 0              | 0                   | 4             | 2                  | 0               | 0                    | 4              | 2                   | 0           | 0                | 0.06       | 0.03            |
| Wdr5        | WD repeat-containing protein 5                                                                | Wdr5,Big,Big3                  | 1              | 0.33                | 4             | 2.5                | 1               | 0.33                 | 5              | 2.5                 | 0.04        | 0.01             | 0.16       | 0.1             |
| Rad21       | Double-strand-break repair protein rad21 homolog                                              | Rad21,Hr21                     | 1              | 0.33                | 4             | 3.5                | 1               | 0.33                 | 7              | 3.5                 | 0.02        | 0.01             | 0.08       | 0.07            |
| Eif2s1      | Eukaryotic translation initiation factor 2 subunit 1                                          | Eif2s1,Eif2a                   | 1              | 0.33                | 3             | 2                  | 1               | 0.33                 | 4              | 2                   | 0.05        | 0.02             | 0.12       | 0.08            |
| Rfc4        | Replication factor C subunit 4                                                                | Rfc4                           | 1              | 0.33                | 3             | 2                  | 1               | 0.33                 | 4              | 2                   | 0.03        | 0.01             | 0.08       | 0.05            |
| Matr3       | Matrin-3                                                                                      | Matr3                          | 1              | 0.33                | 3             | 2.5                | 1               | 0.33                 | 8              | 4                   | 0.02        | 0.01             | 0.05       | 0.04            |
| Rnps1       | RNA-binding protein with serine-rich domain 1                                                 | Rnps1                          | 1              | 1                   | 3             | 2                  | 3               | 1                    | 5              | 2.5                 | 0.05        | 0.05             | 0.11       | 0.08            |
| Nxf1        | Nuclear RNA export factor 1                                                                   | Nxf1,Tap                       | 0              | 0                   | 3             | 2.5                | 0               | 0                    | 6              | 3                   | 0           | 0                | 0.06       | 0.05            |
| Ddx1        | ATP-dependent RNA helicase DDX1                                                               | Ddx1                           | 1              | 0.67                | 3             | 2                  | 2               | 0.67                 | 7              | 3.5                 | 0.01        | 0.01             | 0.04       | 0.03            |
| Stag1       | Cohesin subunit SA-1                                                                          | Stag1,Sa1                      | 1              | 0.33                | 3             | 2                  | 1               | 0.33                 | 4              | 2                   | 0.01        | 0                | 0.03       | 0.02            |
| Pycr2       | Pyruvate carboxylase 2                                                                        | Pycr2                          | 0              | 0                   | 3             | 2                  | 0               | 0                    | 4              | 2                   | 0           | 0                | 0.13       | 0.08            |
| Rpl27       | 60S ribosomal protein L27                                                                     | Rpl27                          | 1              | 0.33                | 2             | 2                  | 1               | 0.33                 | 5              | 2.5                 | 0.07        | 0.02             | 0.12       | 0.12            |

**Supplementary Table 3. Selectivity of OICR-9429 against 215 protein kinases and a panel of GPCRs, ion channels and transporters.** Activity assays were performed at CEREP ([www.cerep.fr/Cerep/Users/index.asp](http://www.cerep.fr/Cerep/Users/index.asp)) at 1  $\mu$ M. As none of these kinases showed >50% inhibition, IC<sub>50</sub> values were assumed to be higher than 1  $\mu$ M, and thus OICR-9429 is >20-fold selective for all kinases measured.

| Protein               | Act (%) | Protein                | Act (%) | Protein            | Act (%) | Protein                                                   | Act (%) |
|-----------------------|---------|------------------------|---------|--------------------|---------|-----------------------------------------------------------|---------|
| Abl kinase            | 107     | FGFR1 kinase           | 96      | NEK6               | 96      | TTK                                                       | 99      |
| Ack                   | 100     | FGFR2 kinase           | 105     | NEK7               | 92      | TXK                                                       | 94      |
| ALK                   | 99      | FGFR3 kinase           | 105     | NIK                | 104     | Tyk2 (JTK1)                                               | 102     |
| Akt1/PKBalpha         | 115     | FGFR4 kinase           | 112     | NuaK1 (ARK5)       | 105     | Tyro3/Sky kinase                                          | 105     |
| Akt2/PKBbeta          | 94      | Fgr kinase             | 102     | p38alpha kinase    | 97      | ULK1                                                      | 92      |
| Akt3/PKBgamma         | 107     | FLT-1 kinase (VEGFR1)  | 110     | p38delta kinase    | 106     | Wee1 kinase                                               | 100     |
| ALK4 (ACVR1B)         | 91      | FLT-3 kinase           | 122     | p70S6K             | 99      | WNK2                                                      | 94      |
| AMPKalpha             | 97      | FLT-4 kinase (VEGFR3)  | 105     | p70S6Kbeta         | 105     | WNK3                                                      | 103     |
| Arg kinase            | 93      | Fms/CSFR kinase        | 130     | PAK2               | 110     | WNK4                                                      | 99      |
| ASK1                  | 100     | FRK                    | 111     | PAK4               | 102     | Yes kinase                                                | 115     |
| AurA/Aur2 kinase      | 104     | Fyn kinase             | 117     | PASK               | 94      | ZAP70 kinase                                              | 103     |
| AurC/Aur3 kinase      | 81      | GCK (MAP4K2)           | 102     | PCTAIRE1 kinase    | 102     | A1 (h) (antagonist radioligand)                           | 100     |
| Axl kinase            | 98      | GRK2 (ADRBK1)          | 110     | PDGFRalpha kinase  | 101     | A2A (h) (agonist radioligand)                             | 101     |
| BMPRI1A (ALK3)        | 102     | GRK3/BARK2 (ADRBK2)    | 95      | PDGFRbeta kinase   | 99      | A3 (h) (agonist radioligand)                              | 95      |
| Brk                   | 107     | GSK3alpha              | 97      | PKD1               | 99      | alpha 1 (non-selective) (antagonist radioligand)          | 99      |
| BRSK1                 | 91      | GSK3beta               | 104     | PEK (EIF2AK3)      | 97      | alpha 2 (non-selective) (antagonist radioligand)          | 98      |
| CaMK1alpha            | 96      | HER2/ErbB2 kinase      | 102     | PhKgamma 1         | 116     | beta 1 (h) (agonist radioligand)                          | 88      |
| CaMK1delta            | 103     | HGK (MAP4K4)           | 96      | PhKgamma 2         | 110     | beta 2 (h) (agonist radioligand)                          | 93      |
| CaMK2alpha            | 111     | HIPK2                  | 100     | Pim1 kinase        | 96      | AT1 (h) (antagonist radioligand)                          | 118     |
| CaMK4                 | 99      | HIPK4                  | 93      | Pim2 kinase        | 101     | BZD (central) (agonist radioligand)                       | 126     |
| CDC2/CDK1 (cycB)      | 105     | IGF1R kinase           | 107     | PKA                | 104     | B2 (h) (agonist radioligand)                              | 104     |
| CDC7/ASK              | 94      | IKKalpha               | 103     | PKCalpha           | 98      | CB1 (h) (agonist radioligand)                             | 95      |
| CDK2 (cycA)           | 104     | IKKbeta                | 105     | PKCbeta 1          | 110     | CCK1 (CCKA) (h) (agonist radioligand)                     | 125     |
| CDK3 (cycE1)          | 83      | IKKepsilon (IKBKE)     | 89      | PKCbeta 2          | 98      | D1 (h) (antagonist radioligand)                           | 100     |
| CDK4 (cycD1)          | 102     | IRAK1                  | 99      | PKCgamma           | 97      | D25 (h) (antagonist radioligand)                          | 97      |
| CDK5/p35              | 102     | IRAK4                  | 99      | PKCdelta           | 101     | ETA (h) (agonist radioligand)                             | 104     |
| CDK6 (cycD3)          | 114     | IRK (InsR)             | 80      | PKCzeta            | 116     | GABA (non-selective) (agonist radioligand)                | 91      |
| CDK7/MAT1 (cycH)      | 82      | IRR kinase             | 112     | PKCeta             | 91      | GAL2 (h) (agonist radioligand)                            | 108     |
| CDK8 (cycC)           | 105     | ITK                    | 107     | PKCtheta           | 98      | CXCR2 (IL-8B) (h) (agonist radioligand)                   | 97      |
| CDK9 (cycT1)          | 98      | JAK1                   | 101     | PKD2               | 104     | CCR1 (h) (agonist radioligand)                            | 106     |
| CHK1                  | 93      | JAK2                   | 103     | PKD3               | 95      | H1 (h) (antagonist radioligand)                           | 106     |
| CHK2                  | 101     | JAK3                   | 103     | PKG1alpha          | 105     | H2 (h) (antagonist radioligand)                           | 87      |
| CK1alpha              | 100     | JNK1                   | 88      | PKG1beta           | 101     | MC4 (h) (agonist radioligand)                             | 86      |
| CK2 (casein kinase 2) | 103     | JNK2                   | 87      | PKG2               | 89      | MT1 (ML1A) (h) (agonist radioligand)                      | 98      |
| c-kit kinase          | 73      | JNK3                   | 102     | PKN1               | 96      | M1 (h) (antagonist radioligand)                           | 98      |
| CLK1                  | 99      | KDR kinase (VEGFR2)    | 99      | PKN2               | 93      | M2 (h) (antagonist radioligand)                           | 92      |
| CLK2                  | 105     | Lck kinase             | 112     | PKR (EIF2AK2)      | 109     | M3 (h) (antagonist radioligand)                           | 83      |
| c-Met kinase          | 90      | LIMK1                  | 103     | PLK1               | 99      | NK2 (h) (agonist radioligand)                             | 99      |
| COT kinase (MAP3K8)   | 113     | LTK                    | 105     | PLK2               | 98      | NK3 (h) (antagonist radioligand)                          | 99      |
| CRK                   | 93      | Lyn A kinase           | 107     | PLK4               | 97      | Y1 (h) (agonist radioligand)                              | 115     |
| DAPK1                 | 94      | Lyn B kinase           | 100     | PRKX               | 103     | Y2 (h) (agonist radioligand)                              | 127     |
| DAPK2                 | 102     | MEK5 (MAP2K5)          | 100     | PYK2               | 104     | NTS1 (NT1) (h) (agonist radioligand)                      | 85      |
| DCAMKL1               | 114     | MEK4 (MAP3K4)          | 101     | B-Raf kinase       | 101     | delta 2 (DOP) (h) (agonist radioligand)                   | 103     |
| DCAMKL2               | 114     | MAPKAPK2               | 114     | RAF-1 kinase       | 95      | kappa (KOP) (agonist radioligand)                         | 102     |
| DDR2 kinase           | 110     | MAPKAPK5 (PRAK)        | 78      | Ret kinase         | 104     | mu (MOP) (h) (agonist radioligand)                        | 103     |
| DLK1 (MAP3K12)        | 102     | MARK1                  | 104     | RIPK2              | 98      | NOP (ORL1) (h) (agonist radioligand)                      | 99      |
| DRAK1                 | 101     | MARK2                  | 109     | ROCK1              | 101     | EP4 (h) (agonist radioligand)                             | 113     |
| DYRK1a                | 99      | MARK3                  | 104     | ROCK2              | 100     | 5-HT1A (h) (agonist radioligand)                          | 109     |
| DYRK2                 | 87      | MARK4                  | 100     | Ron kinase         | 106     | 5-HT1B (antagonist radioligand)                           | 118     |
| DYRK4                 | 92      | MEK3 (MAP3K3)          | 97      | RSK1               | 110     | 5-HT2A (h) (antagonist radioligand)                       | 97      |
| EGFR kinase           | 100     | NIM1 kinase (MGC42105) | 102     | RSK2               | 103     | 5-HT2B (h) (agonist radioligand)                          | 72      |
| EphA1 kinase          | 88      | MINK                   | 107     | RSK3               | 115     | 5-HT3 (h) (antagonist radioligand)                        | 91      |
| EphA2 kinase          | 89      | MLK1                   | 96      | SGK1               | 100     | 5-HT5a (h) (agonist radioligand)                          | 110     |
| EphA3 kinase          | 105     | MNK1                   | 94      | SGK3               | 100     | 5-HT6 (h) (agonist radioligand)                           | 94      |
| EphA4 kinase          | 93      | MLK2 (MAP3K10)         | 98      | SIK                | 98      | 5-HT7 (h) (agonist radioligand)                           | 67      |
| EphA5 kinase          | 97      | MNK2                   | 91      | Src kinase         | 86      | sst (non-selective) (agonist radioligand)                 | 108     |
| EphA7 kinase          | 98      | MOS kinase             | 108     | STK33              | 92      | VPAC1 (VIP1) (h) (agonist radioligand)                    | 112     |
| EphB1 kinase          | 118     | MSK2                   | 114     | Syk                | 100     | V1a (h) (agonist radioligand)                             | 101     |
| EphB2 kinase          | 105     | MST1 kinase (STK4)     | 97      | TAK1-TAB1 (MAP3K7) | 105     | Ca2+ channel (L, verapamil site) (antagonist radioligand) | 101     |
| EphB3 kinase          | 76      | MST2 kinase            | 100     | TAOK2 (TAO1)       | 103     | KV channel (antagonist radioligand)                       | 121     |
| EphB4 kinase          | 106     | MST3 kinase            | 95      | TBK1               | 100     | SKCa channel (antagonist radioligand)                     | 105     |
| ERK1                  | 112     | MST4 kinase            | 102     | TIE2 kinase        | 103     | Na+ channel (site 2) (antagonist radioligand)             | 94      |
| ERK2 (P42mapk)        | 100     | MusK                   | 105     | Tnk1               | 95      | Cl- channel (GABA-gated) (antagonist radioligand)         | 110     |
| ERK5 (MAPK7)          | 92      | MYT1 kinase            | 88      | TRKA               | 97      | norepinephrine transporter (h) (antagonist radioligand)   | 94      |
| FAK                   | 106     | NDR1 kinase            | 98      | TRKB               | 96      | dopamine transporter (h) (antagonist radioligand)         | 105     |
| Fes kinase            | 106     | NEK2                   | 100     | TRKC               | 114     | 5-HT transporter (h) (antagonist radioligand)             | 108     |
| Fer kinase            | 103     | NEK4                   | 100     | TSSK1              | 93      |                                                           |         |

**Supplementary Table 4. Selectivity of OICR-9429 against 22 protein methyltransferases and DNMT1.** .As the lowest activity was 79% for all PMTs tested at 50  $\mu$ M, IC<sub>50</sub> values were assumed to be higher than 50  $\mu$ M, and thus OICR-9429 is >1000-fold selective for all PMTs measured.

| <b>Protein</b> | <b>Activity (%)<br/>at 50 <math>\mu</math>M</b> |
|----------------|-------------------------------------------------|
| SMYD2          | 99                                              |
| G9a            | 92                                              |
| EHMT1          | 111                                             |
| SUV39H2        | 106                                             |
| SETDB1         | 89                                              |
| SETD7          | 109                                             |
| SETD8          | 103                                             |
| SUV420H1       | 113                                             |
| SUV420H2       | 106                                             |
| PRMT1          | 97                                              |
| PRMT3          | 100                                             |
| PRMT5          | 100                                             |
| PRMT6          | 95                                              |
| PRMT8          | 97                                              |
| PRMD9          | 98                                              |
| EZH1           | 101                                             |
| EZH2           | 111                                             |
| NSD1           | 111                                             |
| NSD2           | 79                                              |
| NSD3           | 122                                             |
| SETD2          | 119                                             |
| DOT1L          | 94                                              |
| DNMT1          | 102                                             |

## Supplementary Table 5. Crystallography data and refinement statistics

| WDR5+OICR-9429                                       |                         |
|------------------------------------------------------|-------------------------|
| <b>Data collection</b>                               |                         |
| Space group                                          | P1                      |
| Cell dimensions                                      |                         |
| <i>a</i> , <i>b</i> , <i>c</i> (Å)                   | 46.8, 56.6, 64.7        |
| <i>α</i> , <i>β</i> , <i>γ</i> (°)                   | 71.5, 88.9, 65.4        |
| Resolution (Å)                                       | 50.00-1.50(1.53-1.50) * |
| <i>R</i> <sub>sym</sub> or <i>R</i> <sub>merge</sub> | 6.7(39.2)               |
| <i>I</i> / <i>σI</i>                                 | 39.5(6.0)               |
| Completeness (%)                                     | 94.8(70.2)              |
| Redundancy                                           | 3.7(3.7)                |
| <b>Refinement</b>                                    |                         |
| Resolution (Å)                                       | 50.00-1.50              |
| No. reflections                                      | 85825                   |
| <i>R</i> <sub>work</sub> / <i>R</i> <sub>free</sub>  | 19.5/22.7               |
| No. atoms                                            |                         |
| Protein                                              | 4699                    |
| Ligand/ion                                           | 72                      |
| Water                                                | 332                     |
| <i>B</i> -factors                                    |                         |
| Protein                                              | 15.4                    |
| Ligand/ion                                           | 14.4                    |
| Water                                                | 23.5                    |
| R.m.s. deviations                                    |                         |
| Bond lengths (Å)                                     | 0.009                   |
| Bond angles (°)                                      | 1.373                   |



**Supplementary Table 6. qPCR primers used in this study**

|                      |                    |                                                  |
|----------------------|--------------------|--------------------------------------------------|
| <i>Wdr5</i>          | Forward<br>Reverse | GGTCATCAGATTCTAACCTCCT<br>GGTTGAAATGAACGGCTGAG   |
| <i>C3ar1</i>         | Forward<br>Reverse | ATGATCCTGAGTTCCTTTACC<br>TCCAATAGACAAGTGAGACC    |
| <i>Ccl9</i>          | Forward<br>Reverse | CCCACTAAGAAGATGAAGCCT<br>CTTGCTGATAAAGATGATGCC   |
| <i>Lilrb3</i>        | Forward<br>Reverse | AAGGCTCTCATTGGAGTGTC<br>CTGAAGCATATAGGCTTTCTTCC  |
| <i>Lyz2</i>          | Forward<br>Reverse | AATGGCTGGCTACTATGGAG<br>CTCTTGGCACATTGTATGGCT    |
| <i>Lcn2</i>          | Forward<br>Reverse | GAAATATGCACAGGTATCCTCAG<br>AGAAGATGATGTTGTCGTCCT |
| <i>Csfr3</i>         | Forward<br>Reverse | CCGCCAGTTTGTATCATGTC<br>ACTGGAAGGTTTCCTCTGTC     |
| <i>Pf4</i>           | Forward<br>Reverse | CACTTAAGAGCCCTAGACCC<br>CTGGTGATGTGCTTAAGATGG    |
| <i>Mll1</i>          | Forward<br>Reverse | TGAACATCCTCAACCCACTC<br>ATACACAAACTCTACATGCCCA   |
| <i>Mll2</i>          | Forward<br>Reverse | CTGCTTACCAAGAATAACCTGAG<br>CACTCTCCATTCTGACATCCT |
| <i>Mll3</i>          | Forward<br>Reverse | CCTGCAAGATACATCAACCAC<br>CAATGAAGTGTGAATCGCCT    |
| <i>Wbp7</i>          | Forward<br>Reverse | TATGATGGGAAGGGTATTGGG<br>GCCTCAGTTAAGAAAGCGAC    |
| <i>Cdk6</i> promoter | Forward<br>Reverse | AAAAGGAGCGACCCGAGAC<br>GTATGATTCACCTTGAGTCTGATT  |
| <i>Kit</i> promoter  | Forward<br>Reverse | TAAAAGTTGCGCGTGGGTGA<br>CAAGCAAGCCCGAGATTCGT     |
| <i>Etv6</i> promoter | Forward<br>Reverse | GTCACAGTGGTGGTCTACCC<br>TGCAGTGAAACAAGCGGTTTC    |

**Supplementary Table 7. shRNA sequences used in this study**

| <b>target</b>                                                                                 | <b>sequence</b>                                                                                       |
|-----------------------------------------------------------------------------------------------|-------------------------------------------------------------------------------------------------------|
| <b><i>Retroviral shRNA sequences (97-mer mir30 insert, in TRN and LMN vectors)</i></b>        |                                                                                                       |
| Ren.713                                                                                       | TGCTGTTGACAGTGAGCGCAGGAATTATAATGCTTATCTATAGTGAAGCCACAGATGTATAGATAAGCAT<br>TATAATTCCTATGCCTACTGCCTCGGA |
| Wdr5.1765                                                                                     | TGCTGTTGACAGTGAGCGCCTGGTATCACTCAGTAAGCTATAGTGAAGCCACAGATGTATAGCTTACTG<br>AGTGATACCAGTTGCCTACTGCCTCGGA |
| Wdr5.2837                                                                                     | TGCTGTTGACAGTGAGCGATTGAACTCTGTTGTAGATTTATAGTGAAGCCACAGATGTATAAATCTACAA<br>CAGAGTTCAACTGCCTACTGCCTCGGA |
| Mil1.13303                                                                                    | TGCTGTTGACAGTGAGCGCCGCGGTATTATCCTAATTTATAGTGAAGCCACAGATGTATAAATTAGGA<br>TAATACCGCGGTTGCCTACTGCCTCGGA  |
| Mil2.5430                                                                                     | TGCTGTTGACAGTGAGCGACCGATGTAACAAATCATGAATAGTGAAGCCACAGATGTATTCATGATTT<br>GTTTACATCGGCTGCCTACTGCCTCGGA  |
| Mil3.1099                                                                                     | TGCTGTTGACAGTGAGCGCCACCTTGGAGCCACTATCAAATAGTGAAGCCACAGATGTATTTGATAGTG<br>GCTCCAAGGTGTTGCCTACTGCCTCGGA |
| Wbp7.6965                                                                                     | TGCTGTTGACAGTGAGCGATTGAGTCGTGTTTCGCATGAAATAGTGAAGCCACAGATGTATTCATGCCA<br>ACACGACTGAACTGCCTACTGCCTCGGA |
| <b><i>Lentiviral shRNA (in pLKO1-Puro vector), used for in vitro re-plating assay</i></b>     |                                                                                                       |
| shCtrl                                                                                        | CGTGCATAATAAGAATCCAAA                                                                                 |
| shWdr5                                                                                        | GCAGCGTTAGAGAACGACAAA                                                                                 |
| <b><i>Lentiviral shRNA (in pLKO1-GFP vector), used for in vivo transplantation assay</i></b>  |                                                                                                       |
| shCtrl                                                                                        | CGTGCATAATAAGAATCCAAA                                                                                 |
| shWdr5-1                                                                                      | CGTGCATAATAAGAATCCAAA                                                                                 |
| shWdr5-2                                                                                      | GCCGTTCAATTTCAACCGTGAT                                                                                |
| shWdr5-3                                                                                      | GCCAAACTATGCCCTGAAGTT                                                                                 |
| <b><i>Lentiviral shRNA (in pLV719G vector), used for knockdown of WDR5 in human cells</i></b> |                                                                                                       |
| shLuc                                                                                         | GATATGGGCTCACTGAGACTACTT                                                                              |
| shWDR5-1                                                                                      | GCCAAACTATGCTCTAAAGTT                                                                                 |
| shWDR5-2                                                                                      | GCTCAGAGGATAACCTTGTTT                                                                                 |

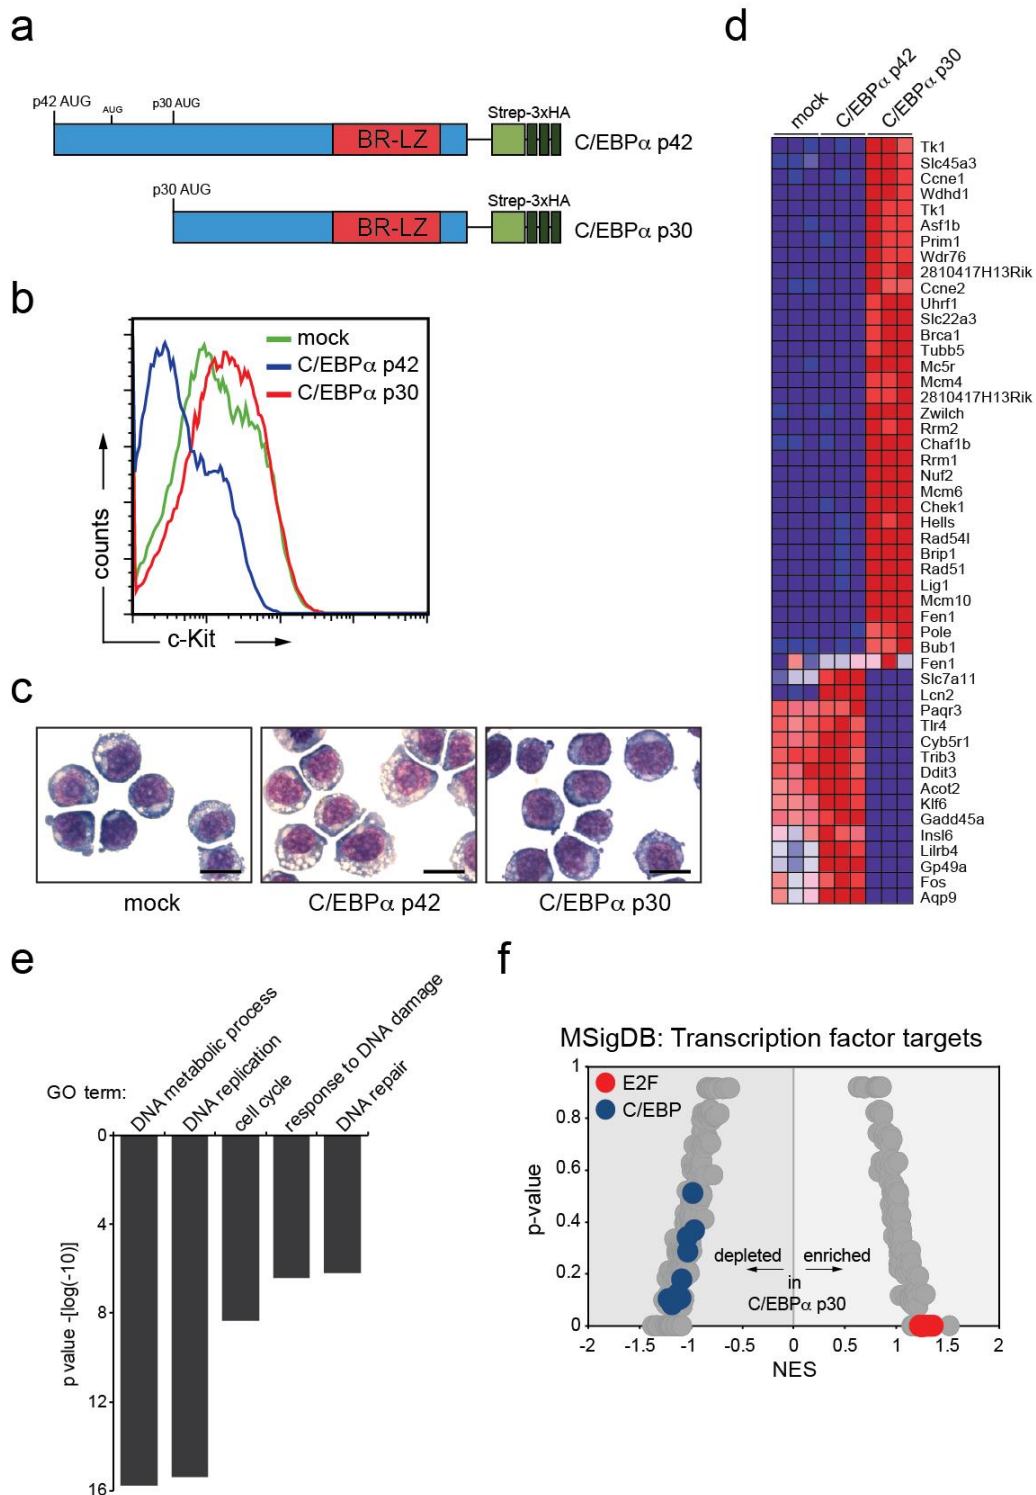

**Supplementary Figure 1. An isogenic cell system to study cellular effects of C/EBP $\alpha$  variants. (a)** Schematic representation of constructs used in this study. The Strep-3xHA tag was fused to the C-terminus of C/EBP $\alpha$  p42 or p30. **(b)** Flow cytometric analysis of c-Kit expression of FDCCP-1 cells expressing C/EBP $\alpha$  p42 or

p30. **(c)** Histological staining of cytospin preparations of FDCP-1 cells expressing C/EBP $\alpha$  p42 or p30. Scale bar, 10  $\mu$ m **(d)** Heatmap representations of the top 47 genes differentially regulated upon p30 expression in FDCP-1 cells (FDR 0.01, fold change >6) **(e)** Gene Ontology (GO)-analysis of genes shown in (e) **(f)** Gene Set enrichment (GSEA) for all transcription factor target gene sets available from the MSigDB. p-values are plotted versus normalized enrichment score (NES) for each gene set. Gene sets for E2F and C/EBP transcription factors are highlighted in red and blue, respectively.

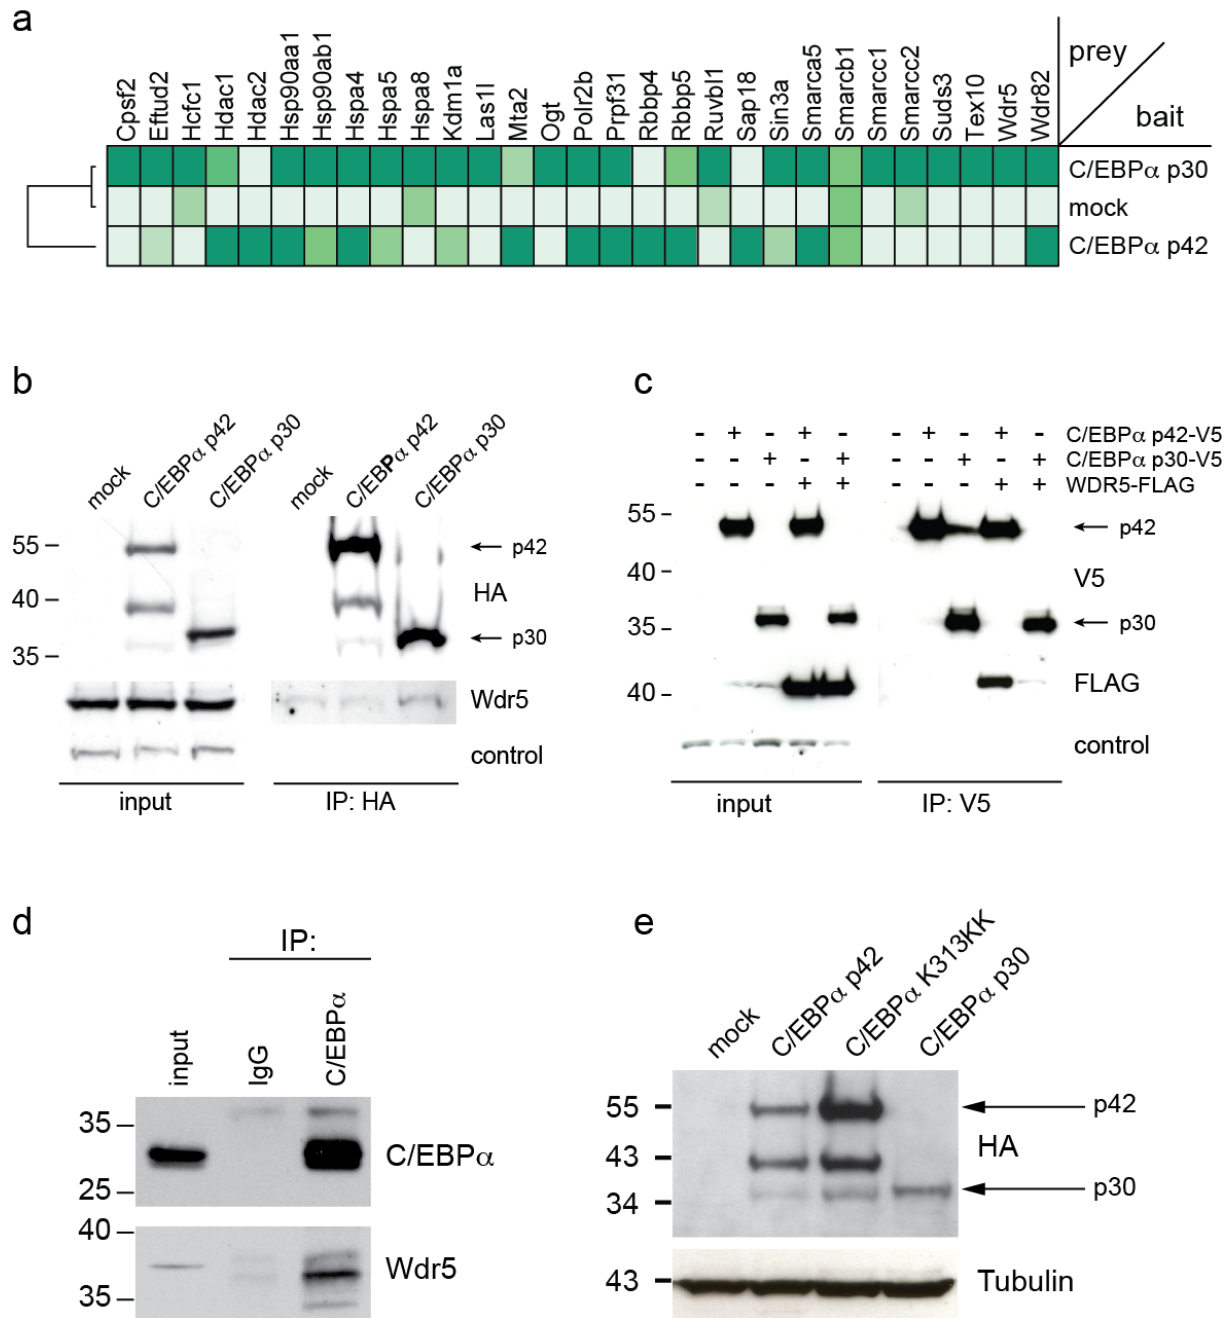

**Supplementary Figure 2. Wdr5 preferably interacts with C/EBP $\alpha$  p30 in myeloid cells** (a) Proteins present in the p42 and/or p30 AP-MS datasets were filtered for proteins that were previously found associated with Wdr5 and MLL (as published in the CORUM database, <http://mips.helmholtz-muenchen.de/genre/proj/corum/>). Data are presented based on average spectral counts of each protein in the respective AP-MS datasets. (b) Left panel: extracts from FDCP-1 cells expressing tagged variants of p42 or p30 were analyzed by Western blot for expression of HA and Wdr5. Right panel: Western blot analysis of HA and Wdr5 from anti-HA-purifications of

tagged C/EBP $\alpha$  variants from FDCP-1 cell lines stably expressing p42 and p30. **(c)** Left panel: extracts from HEK293 cells transfected with indicated tagged variants of p42, p30 and Wdr5 were analyzed by Western blot for expression of V5 and FLAG. Right panel: Western blot analysis of FLAG and V5 from anti-V5-immunoprecipitates of the same samples. **(d)** Western blot analysis of C/EBP $\alpha$  and Wdr5 from IgG- and anti-C/EBP $\alpha$  immunoprecipitates from lysates of *Cebpa*<sup>p30/p30</sup> cells. **(e)** Extracts from FDCP-1 cells expressing tagged variants of p42, p42 K313KK or p30 were analyzed by Western blot for expression of HA and tubulin. Representative images of at least 2 replicate experiments are shown. Note that tagged variants of p42 and p30 migrate at higher molecular weight than 42 and 30 kDa, respectively. The additional HA-reactive band at 40 kDa in p42-expressing samples arises from translation initiation at an ATG codon that lies between the initiation codons of p42 and p30 (see Supplementary Fig. 1a).

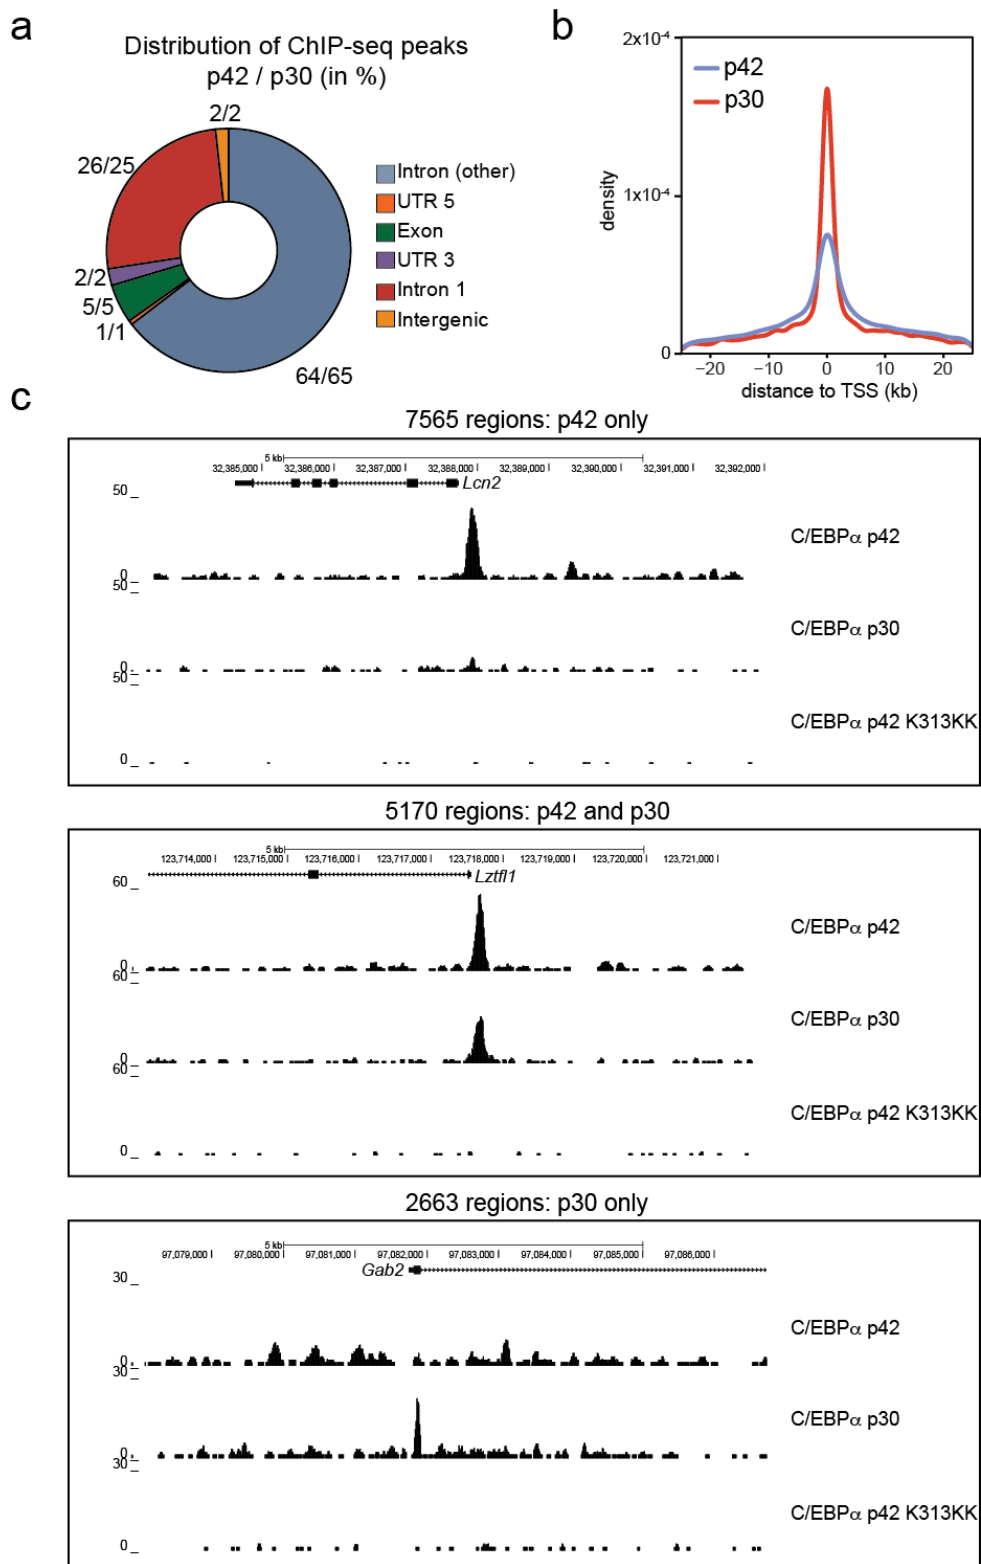

**Supplementary Figure 3. C/EBP $\alpha$  variants display differential chromatin binding.** (a) Distribution of p42/p30 binding sites at various genomic loci. Numbers represent percentages for p42 and p30, respectively. (b) Relative distances of p42-

and p30-ChIP-seq peaks to annotated Transcription Start Sites (TSS) **(c)** Representative UCSC genome browser tracks for promoters bound by C/EBP $\alpha$  p42 and p30 (upper panel), promoters bound by C/EBP $\alpha$  p42, but not p30 (middle panel), or promoters bound by C/EBP $\alpha$  p30, but not p42 (lower panel). The specificity of our experimental approach is validated by a control ChIP-seq experiment for a DNA-binding deficient C/EBP $\alpha$  mutant (K313KK), which did not show any significant chromatin association.



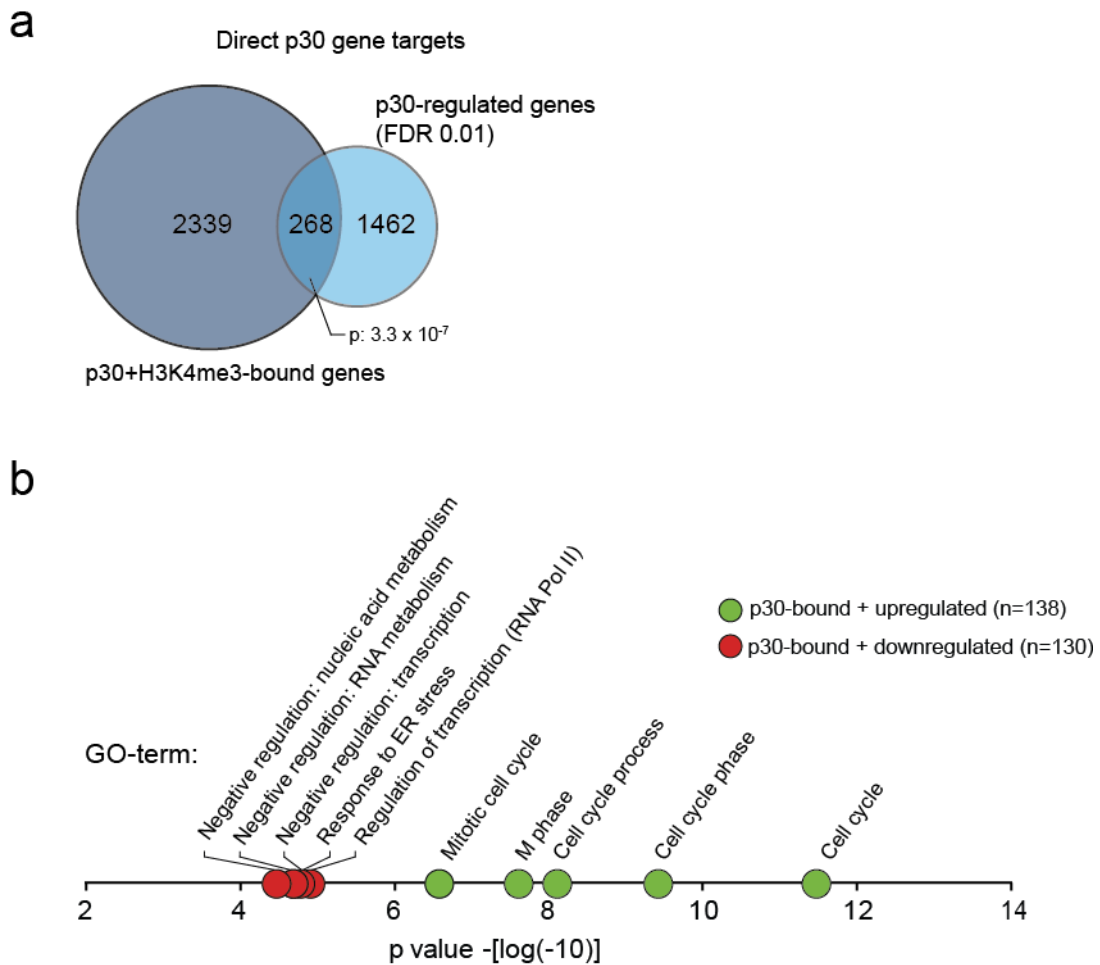

**Supplementary Figure 4. C/EBP $\alpha$  p30 regulates the expression of distinct gene sets.** (a) The Venn diagram represents an intersection of genes whose promoters were bound by p30 and were marked with H3K4me3 to indicate active transcription (left circle, dark blue, 2607 genes) and genes whose expression is de-regulated by p30 expression (right circle, light blue, 1730 genes, FDR 0.01). The 268 genes in the intersection are present in both datasets and are therefore designated “direct p30 gene targets”. (b) Functional annotation of direct p30 gene targets. The list of genes derived in (A) was further subdivided in up-regulated (green) and down-regulated genes (red). Functional annotation was done based on GO terms describing Biological Processes using DAVID. p-values for the top 5 biological processes are plotted for each gene set.

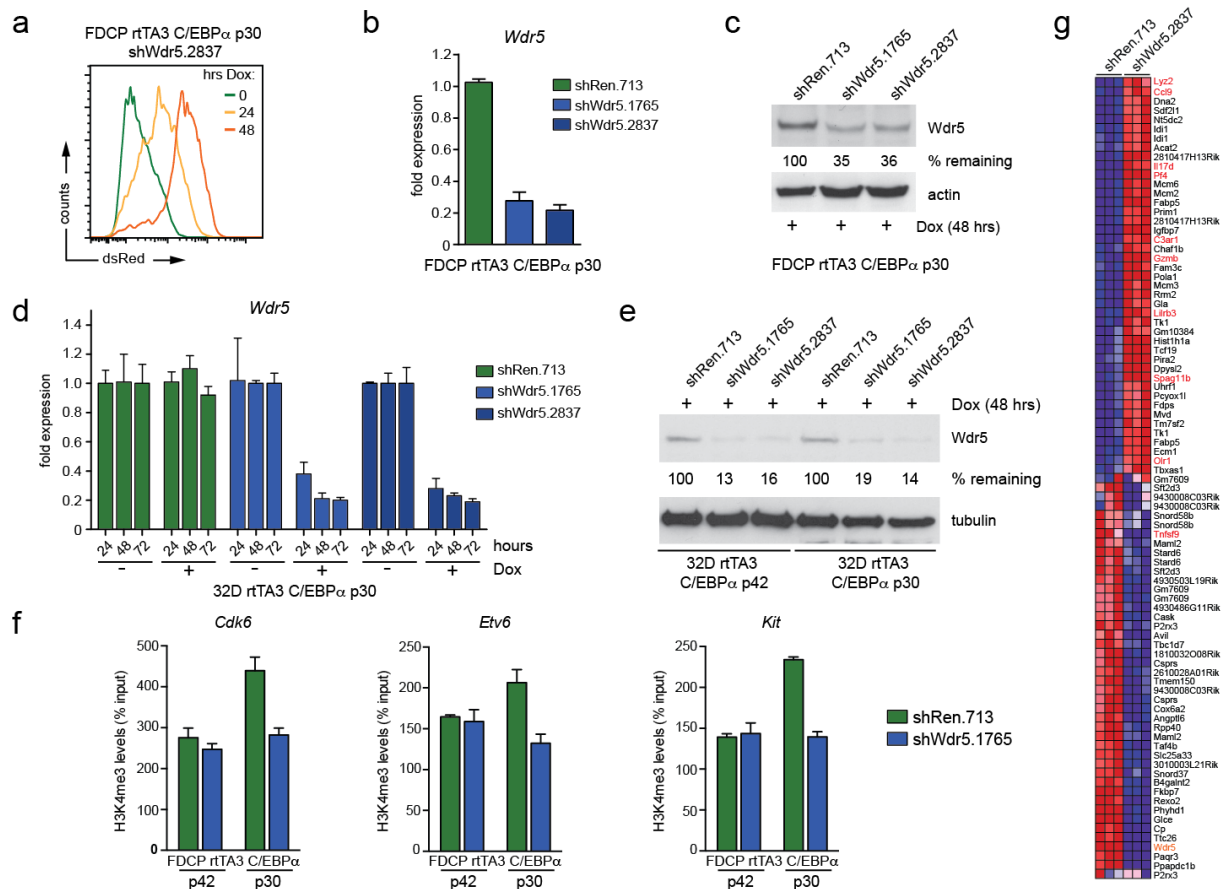

**Supplementary Figure 5. Inducible shRNA-mediated knockdown of *Wdr5* in p30-expressing cells reduces H3K4me3 levels on promoters of p30 target genes and induces upregulation of myeloid gene expression. (a)** Flow cytometric analysis of dsRed-reporter induction in FDCP-1 rTA3 p30 cells upon Dox administration at indicated timepoints. **(b)** qRT-PCR- and **(c)** Western Blot analysis of *Wdr5* expression in FDCP-1 rTA3 p30 cells expressing indicated shRNA constructs after 48 h of Dox treatment. Representative images of at least 2 replicate experiments are shown. **(d)** qRT-PCR- and **(e)** Western Blot analysis of *Wdr5* expression in 32D rTA3 p30 cells expressing indicated shRNA constructs after 48 hrs of Dox treatment. Representative images of at least 2 replicate experiments are shown. **(f)** qPCR analysis of the indicated cell types for specific enrichment on promoters of the *Cdk6* (left), *Etv6* (middle) and *Kit* (right) genes after H3K4me3 ChIP. **(g)** Heatmap representation of differentially regulated genes in FDCP-1 rTA3 p30 cells expressing indicated shRNA constructs after 48 h of Dox treatment (FDR 0.05). Myeloid specific genes and are highlighted in red. *Wdr5* is highlighted in orange. Data are presented as mean +/- standard deviation (SD) of triplicate experiments

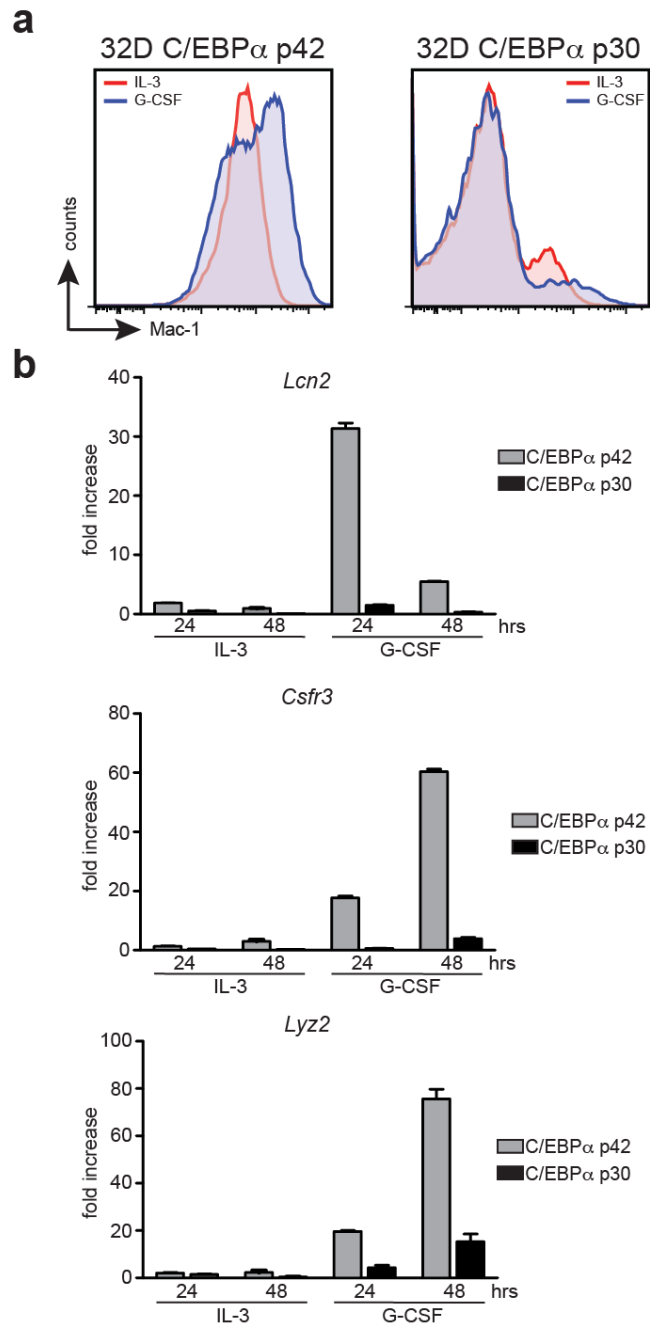

**Supplementary Figure 6. Effects of C/EBP $\alpha$  p42 and p30 isoforms and Wdr5 on the granulocytic differentiation potential of 32D cells (a) Flow cytometric analysis of Mac-1 surface expression in 32D cells expressing C/EBP $\alpha$  p42 (left panel) or C/EBP $\alpha$  p30 (right panel) after culture in the presence of IL-3 (5 ng/mL, red curves) or G-CSF (10 ng/mL, blue curves) (a) qRT-PCR-analysis of the indicated genes in 32D cell expressing C/EBP $\alpha$  p42 (white bars) or C/EBP $\alpha$  p30 (black bars) after culture in the presence of IL-3 or G-CSF for the indicated time. Data are presented as mean +/- standard deviation (SD) of triplicate experiments**

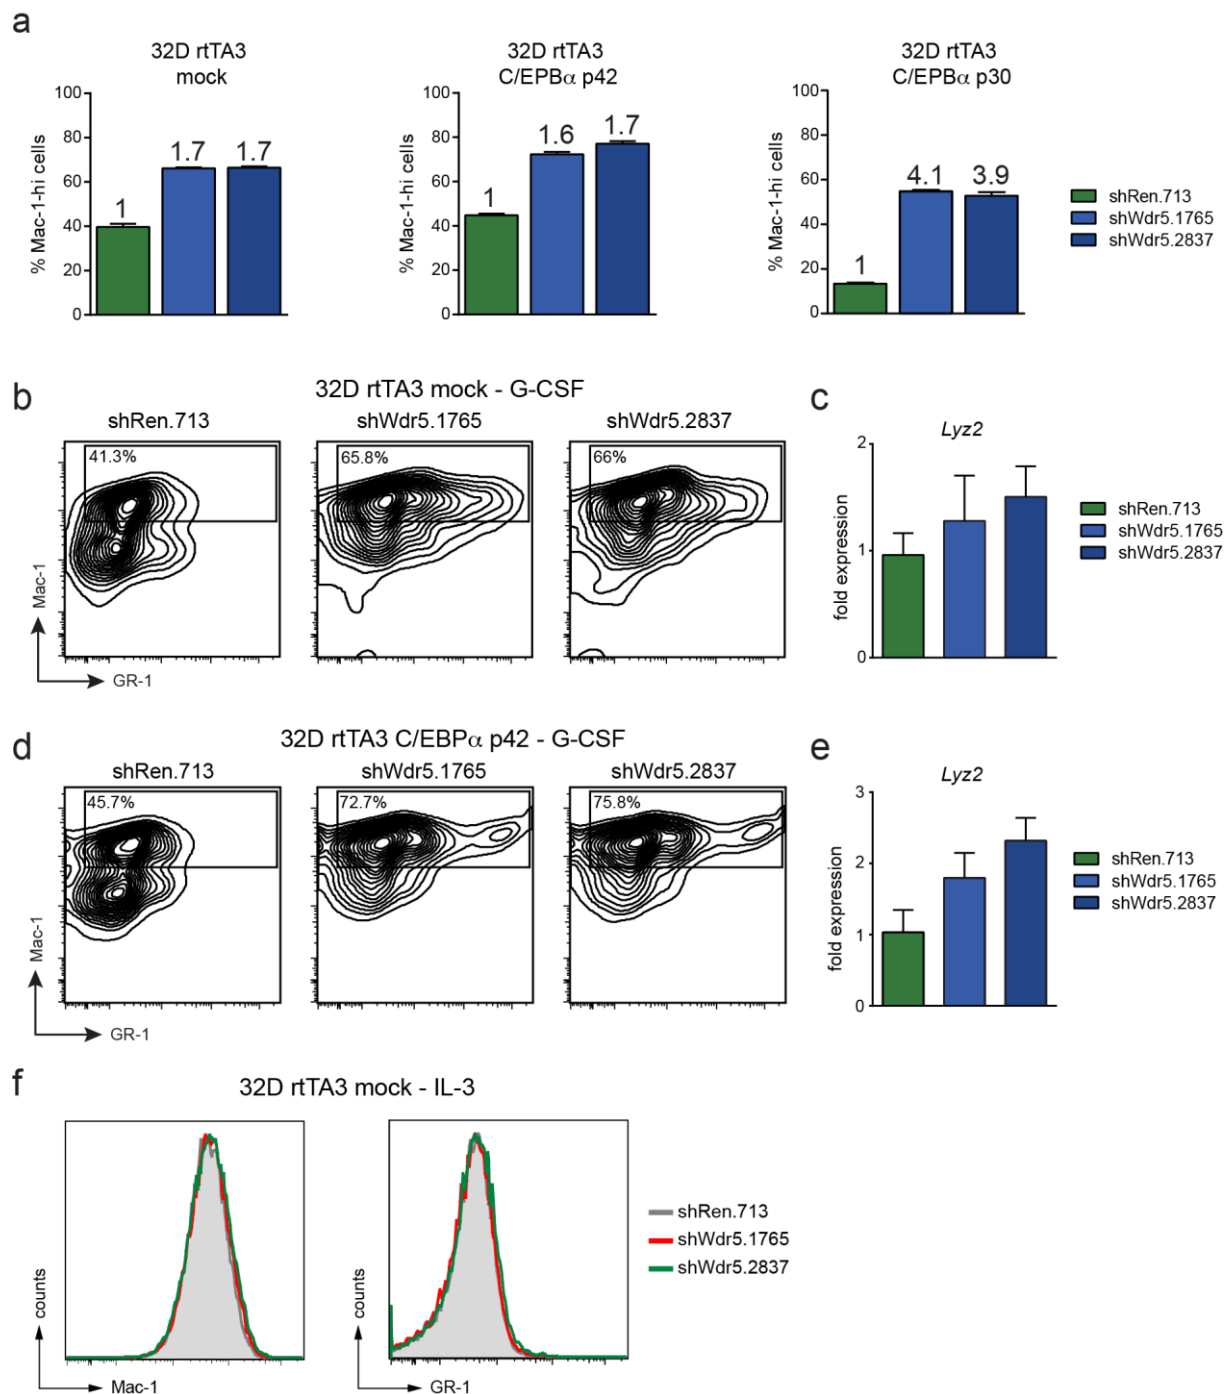

**Supplementary Figure 7. Knockdown of Wdr5 has marginal effects on the granulocytic differentiation potential of 32D cells (a)** statistical representation of percentages of Mac-1<sup>hi</sup> cells from the G-CSF experiment described in Fig. 2c and Supplementary Fig. 7b-e. Numbers above bars represent the fold induction in Mac-1<sup>hi</sup> cells over cells expressing a control shRNA- **(b)** Flow cytometry analysis for Mac-1 and GR-1 surface markers of 32D rtTA3 cells expressing indicated shRNA constructs 96 h after Dox treatment and 48 h after exposure to G-CSF (10 ng/mL). Presented

events are gated on the dsRed+ population. **(c)** qRT-PCR analysis of *Lyz2* expression in 32D rtTA3 cells transduced with indicated shRNA constructs after 96 h of Dox treatment followed by 48 h exposure to G-CSF (10 ng/mL). Data are presented as mean +/- standard deviation (SD) of triplicate experiments. **(d)** Flow cytometry analysis for Mac-1 and GR-1 surface markers of 32D rtTA3 p42 cells expressing indicated shRNA constructs 96 h after Dox treatment and 48 h after exposure to G-CSF (10 ng/mL). Presented events are gated on the GFP+ dsRed+ population. **(e)** qRT-PCR analysis of *Lyz2* expression in 32D rtTA3 p42 cells transduced with indicated shRNA constructs after 96 h of Dox treatment followed by 48 h exposure to G-CSF. Data are presented as mean +/- standard deviation (SD) of triplicate experiments. (f) Flow cytometry analysis for Mac-1 and GR-1 surface markers of 32D rtTA3 cells expressing indicated shRNA constructs 96 h after Dox in the presence of IL-3 (5 ng/mL).

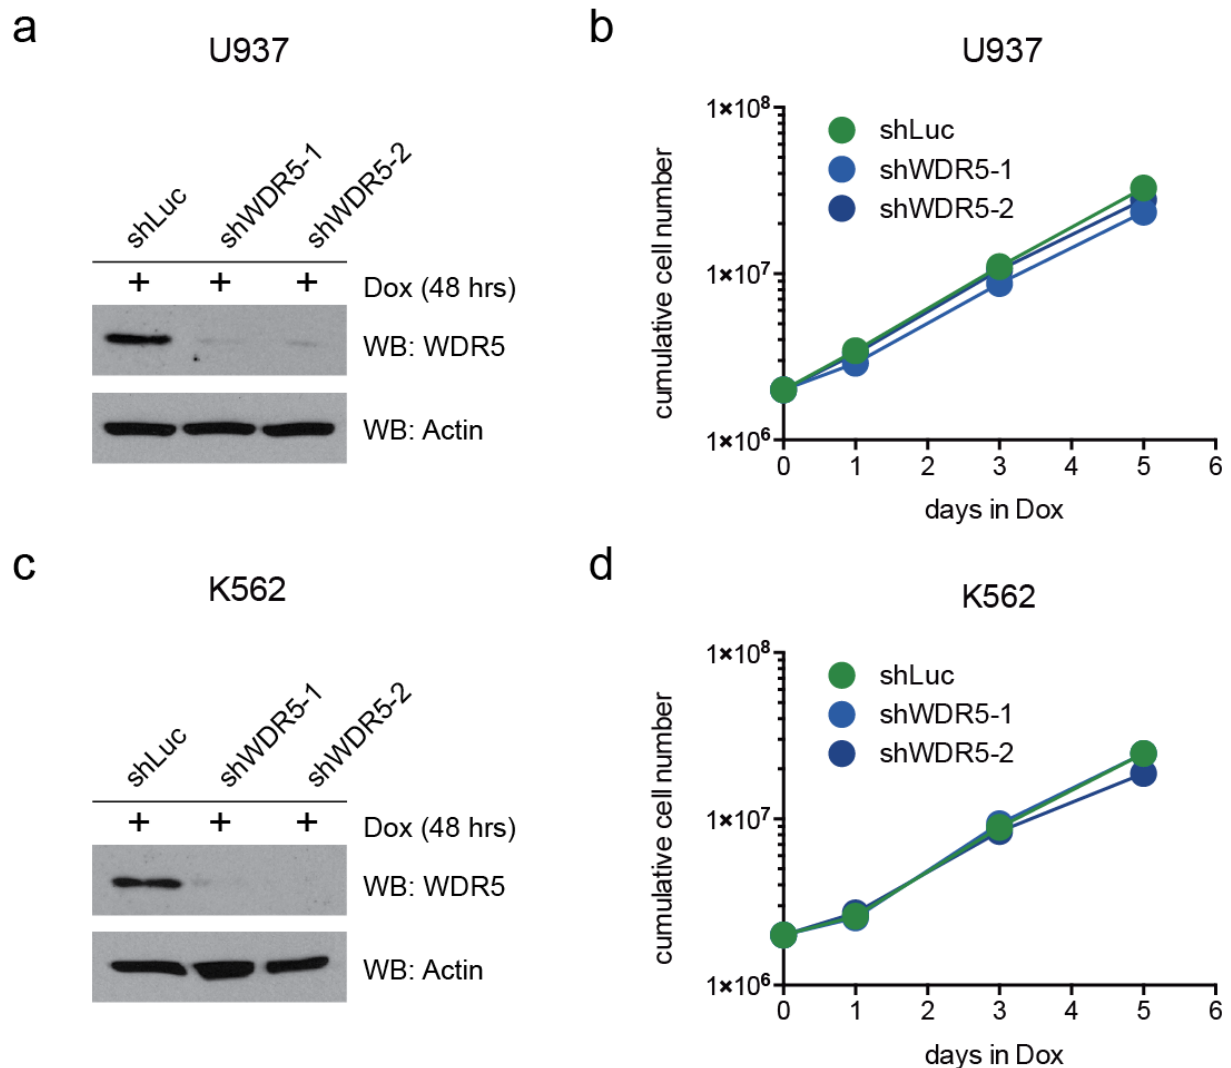

**Supplementary Figure 8. Knockdown of WDR5 does not impair proliferation of U937 and K562 cells.** (a) Extracts from U937 cells expressing indicated shRNA constructs were analyzed by Western blot for expression of WDR5 and Actin. (b) Proliferation curves of U937 cells expressing indicated shRNA constructs after Dox treatment. (c) Extracts from K562 cells expressing indicated shRNA constructs were analyzed by Western blot for expression of WDR5 and Actin. (d) Proliferation curves of K562 cells expressing indicated shRNA constructs after Dox treatment. Data are presented as mean  $\pm$  standard deviation (SD) of triplicate experiments. Representative images of at least 2 replicate experiments are shown.

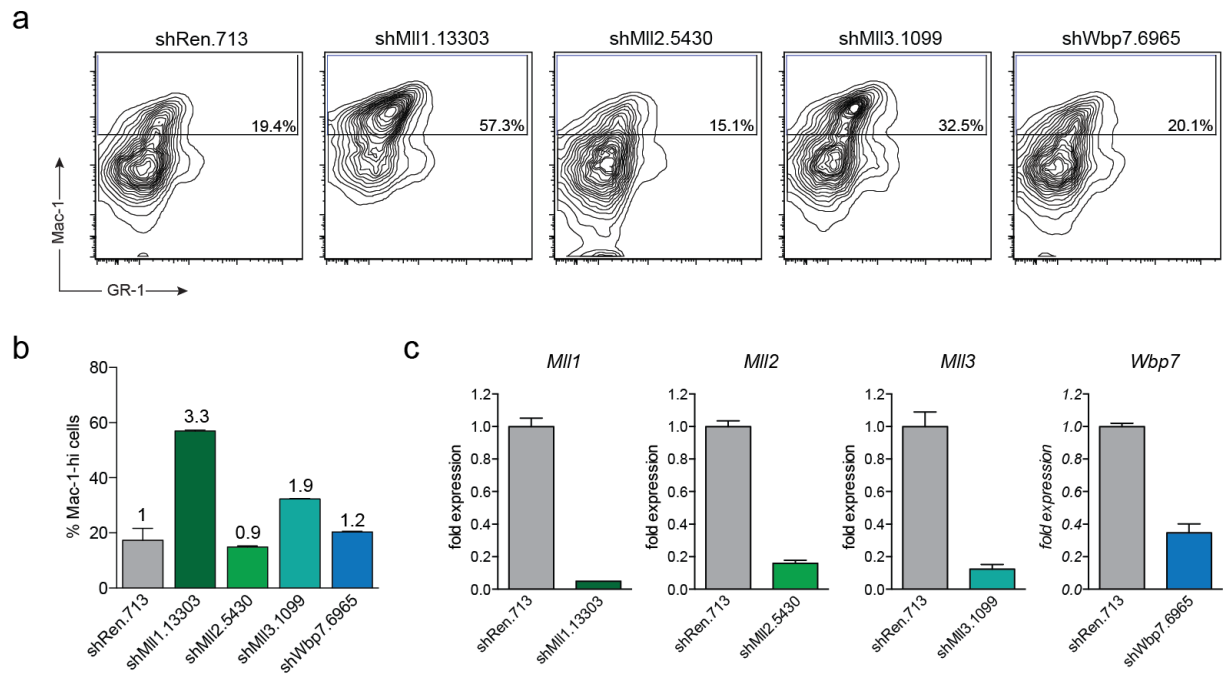

**Supplementary Figure 9. Loss of MII1 or MII3, but not MII2 or MII4/Wbp7 restores granulocytic differentiation potential in C/EBP $\alpha$  p30-expressing cells.** **(a)** Flow cytometry analysis for Mac-1 and GR-1 surface markers of 32D rtTA3 p30 cells expressing indicated shRNA constructs 96 h after Dox treatment and 48 h after exposure to G-CSF (10 ng/mL). Presented events are gated on the GFP<sup>+</sup> dsRed<sup>+</sup> population. **(b)** Statistical representation of percentages of Mac-1<sup>hi</sup> cells from the experiment described in (a) **(c)** qRT-PCR analysis of the indicated genes *in* 32D rtTA3 p30 cells expressing indicated shRNA constructs after 48 h of Dox treatment. Data are presented as mean +/- standard deviation (SD) of triplicate experiments.

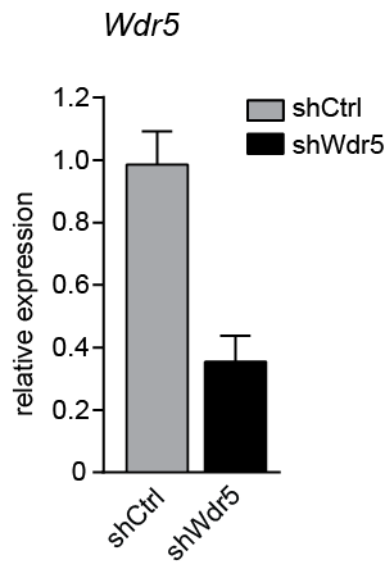

**Supplementary Figure 10. Wdr5 knockdown in primary fetal liver cells from *Cebpa*<sup>p30/p30</sup> mice.** qRT-PCR-analysis of Wdr5 expression levels in *Cebpa*<sup>p30/p30</sup> primary fetal liver cells expressing a control (grey bars) or Wdr5-targeting lentiviral shRNA construct used in Fig. 3a, b. Data are presented as mean +/- standard deviation (SD) of triplicate experiments.



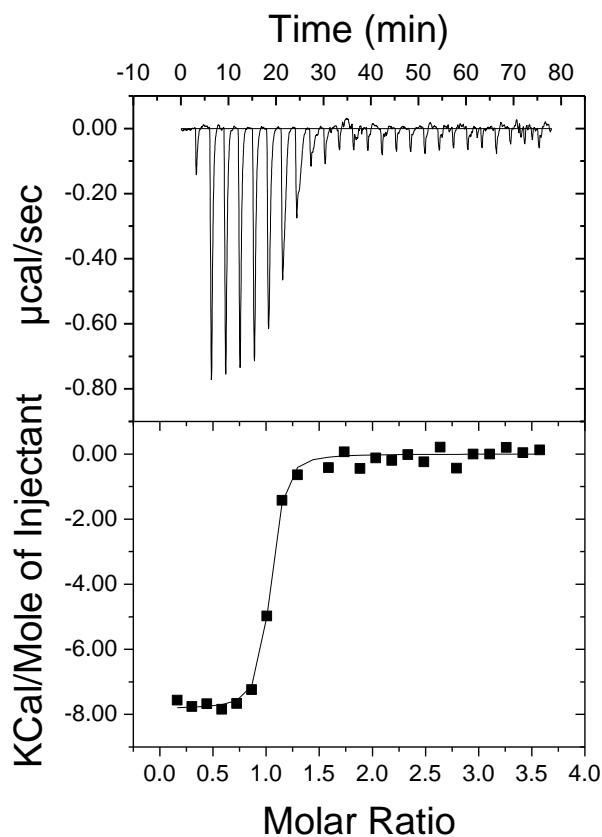

**Supplementary Figure 11. OICR-9429 binds to WDR5.** Binding of OICR-9429 to WDR5 was assessed by ITC. 10  $\mu\text{L}$  aliquots of 300  $\mu\text{M}$  compound solution were titrated over a 15  $\mu\text{M}$  solution of WDR5. DMSO concentration was kept constant at 3% throughout the experiment. The titrations were performed at 25  $^{\circ}\text{C}$  in 100 mM Hepes, 150 mM NaCl, pH 7.4 using a General Electric VP MicroCal calorimeter. A  $K_D$  value of  $93 \pm 28$  nM was calculated from 5 independent experiments.

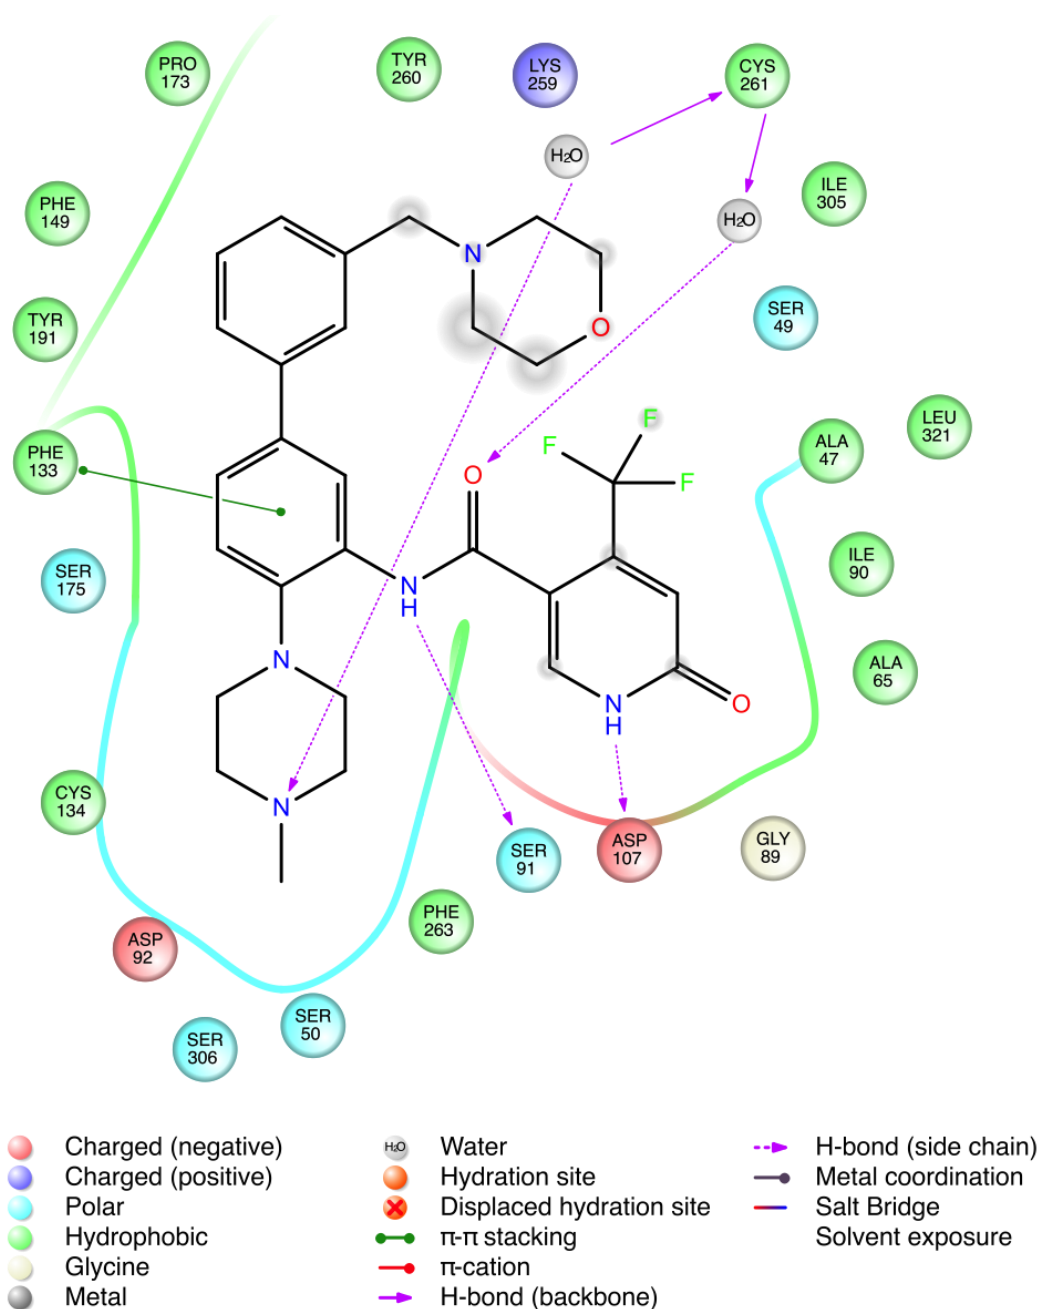

**Supplementary Figure 12. Schematic illustration of key atomic interactions between OICR-9429 and WDR5.** OICR-9429's south-end (methyl-piperazine), east-end (pyridinone) and amide linker form hydrogen bonds with surrounding residues of WDR5 (colored circles), while the north moiety is surrounded with hydrophobic side-chains (interaction map was generated with Maestro).

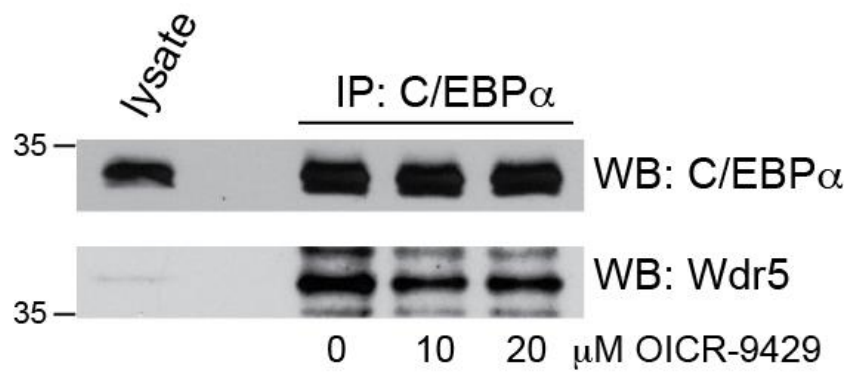

**Supplementary Figure 13. OICR-9429 does not inhibit the C/EBP $\alpha$  p30-Wdr5 interaction.** Western blot analysis of C/EBP $\alpha$ -immunoprecipitates from *Cepba*<sup>p30/p30</sup> cells treated with the indicated concentrations of OICR-9429. Representative images of at least 2 replicate experiments are shown.

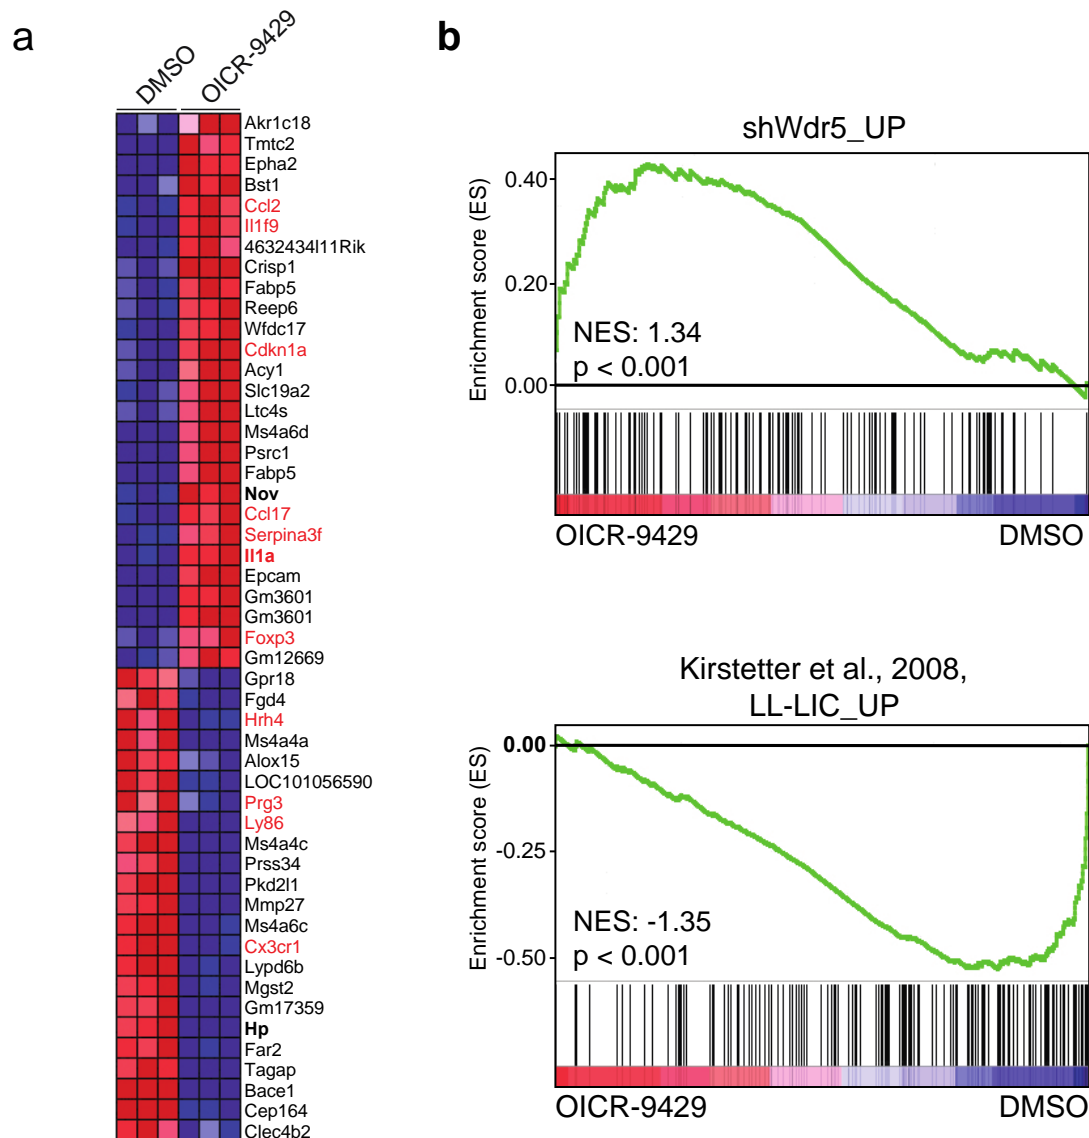

**Supplementary Figure 14. Gene expression analysis of *Cebpa*<sup>p30/p30</sup> cells upon OICR-9429 treatment. (a)** Heatmap representation of differentially regulated genes in *Cebpa*<sup>p30/p30</sup> cells after 72 h of OICR-9429 treatment (20  $\mu$ M, FDR 0.01, fold change 1.75). Myeloid specific genes and are highlighted in red. **(b)** Gene Set Enrichment Analysis showing global up-regulation of Genes induced by Wdr5 knockdown (top) and global down-regulation of the *Cepba*<sup>p30/p30</sup> LIC signature upon OICR-9429 treatment of *Cebpa*<sup>p30/p30</sup> cells (bottom), NES, Normalized Enrichment Score.

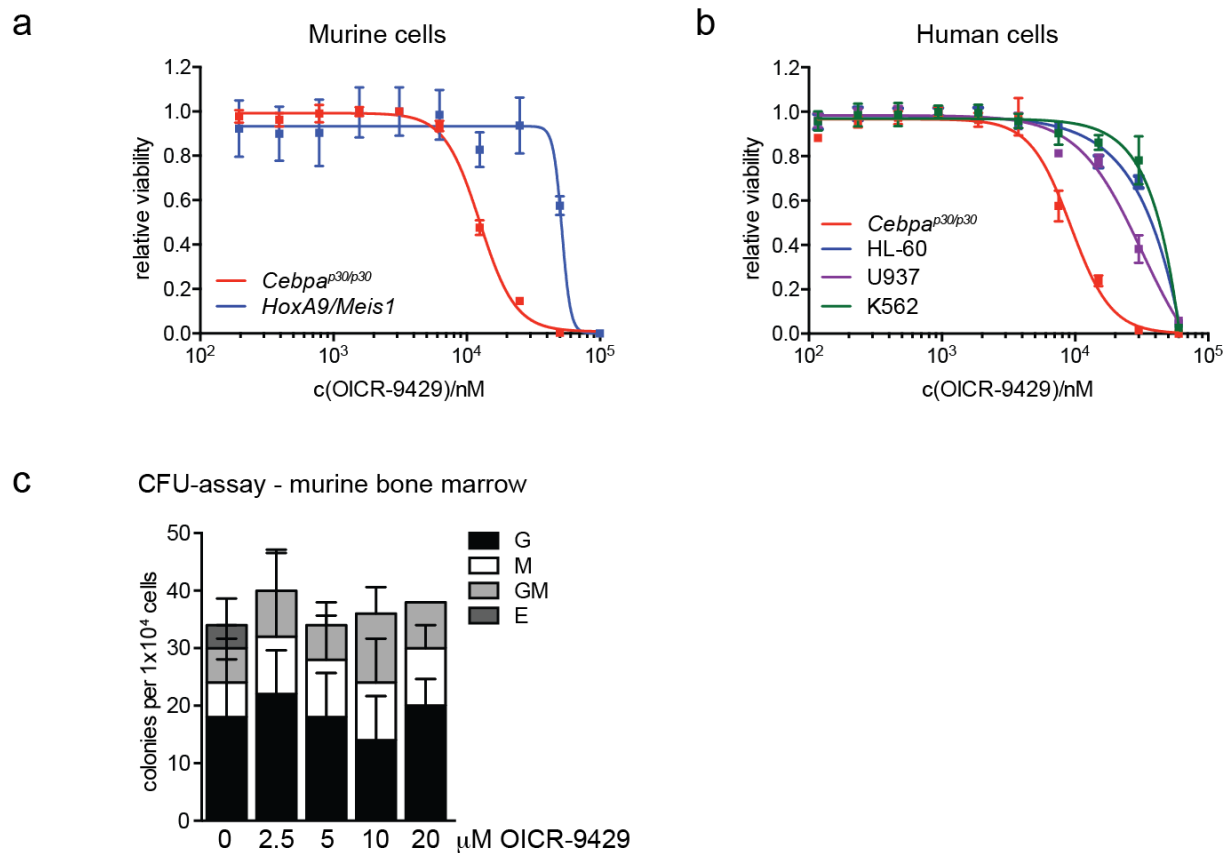

**Supplementary Figure 15. *Cebpa*<sup>p30/p30</sup>-cells are specifically sensitive to Wdr5 antagonism. (a)** Dose response curves for OICR-9429 in *Cebpa*<sup>p30/p30</sup> cells (red) and HoxA9/Meis1-transformed wild-type cells (blue). **(b)** Dose response curves for OICR-9429 in *Cebpa*<sup>p30/p30</sup> cells (red), HL-60 (blue), U937 (purple) and K562 cells (green). **(c)** CFU-assay of primary murine bone marrow cells in the presence of indicated concentrations of OICR-9429. Data are presented as mean +/- standard deviation (SD) of triplicate experiments.

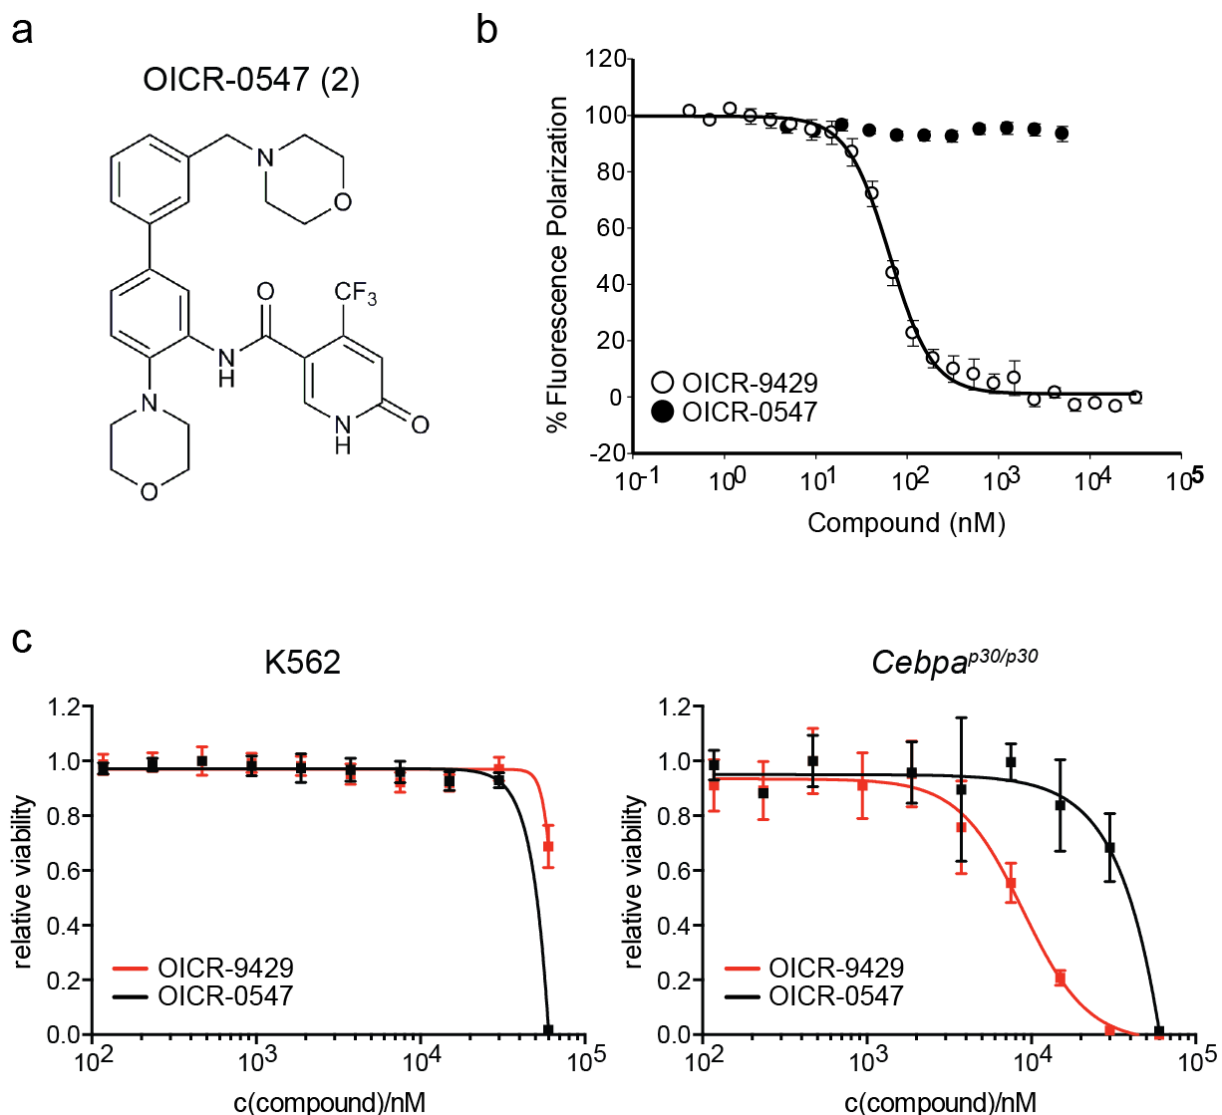

**Supplementary Figure 16. OICR-0547, an inactive control compound, does not bind to WDR5 and has no effect on cellular viability. (a)** Chemical structure of OICR-0547. OICR-0547 was designed as an inactive control compound where the methylpiperazine moiety was replaced with a morpholine ring, which should lead to the inability of the compound to bind in the arginine-binding pocket of WDR5. **(b)** Peptide displacement assay monitoring the decrease in fluorescence polarization (FP) signal of a modified fluorescein labeled MLL peptide upon compound-induced dissociation from WDR5. **(c)** Dose response curves for OICR-9429 (red) and OICR-0547 (black) in K562 cells (left panel) and *Cebpa*<sup>p30/p30</sup> cells (right panel). Note that OICR-0547 induces non-selective toxicity at high doses in both cell types, which might results from off-target activity. Data are presented as mean +/- standard deviation (SD) of triplicate experiments.

Full, uncut gel images for Figures 1, 5 and Supplementary Figures 2, 5, 8 and 13.

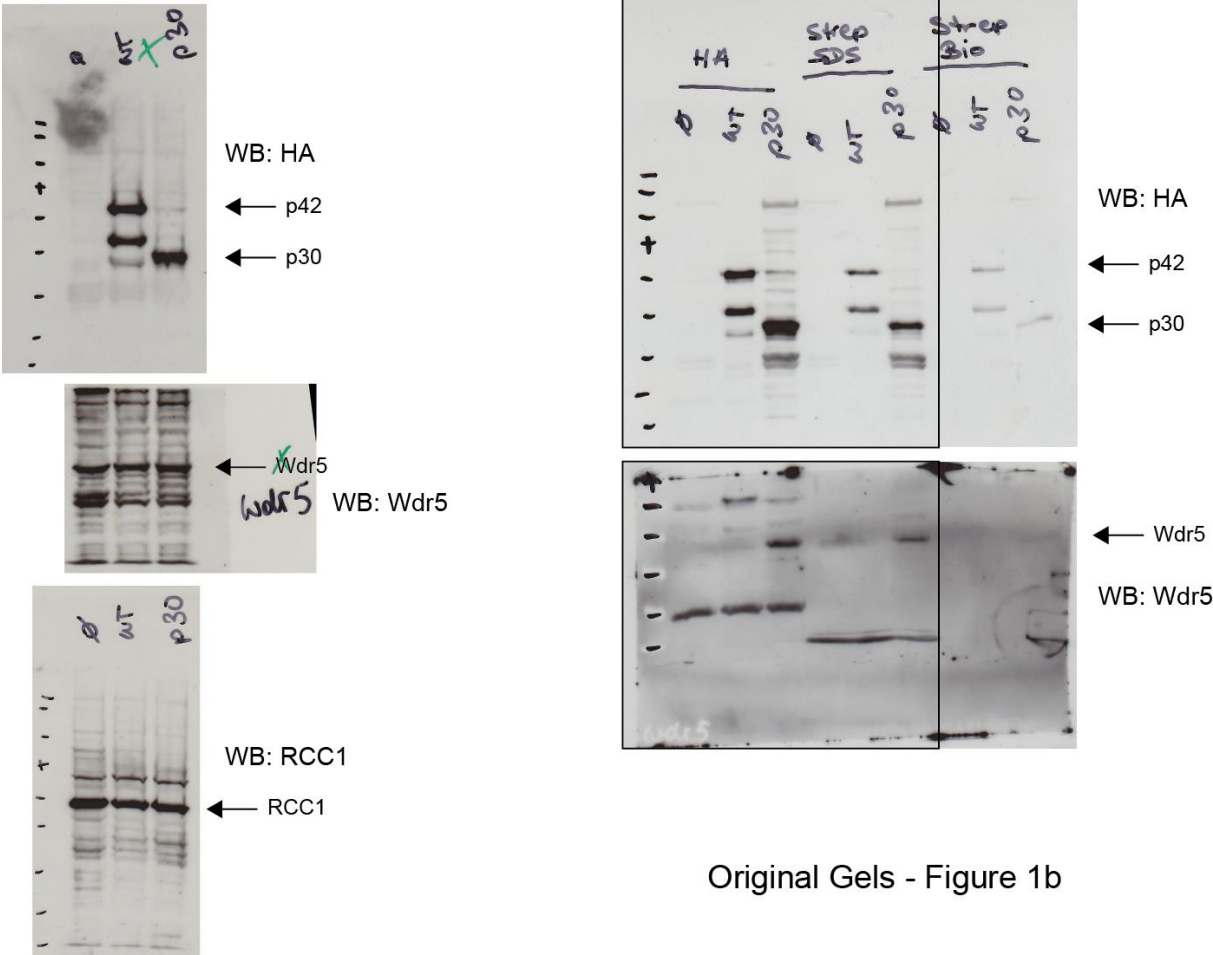

Original Gels - Figure 1b

Figure 5a

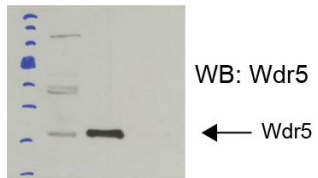

Original Gels - Figure 5

Figure 5c

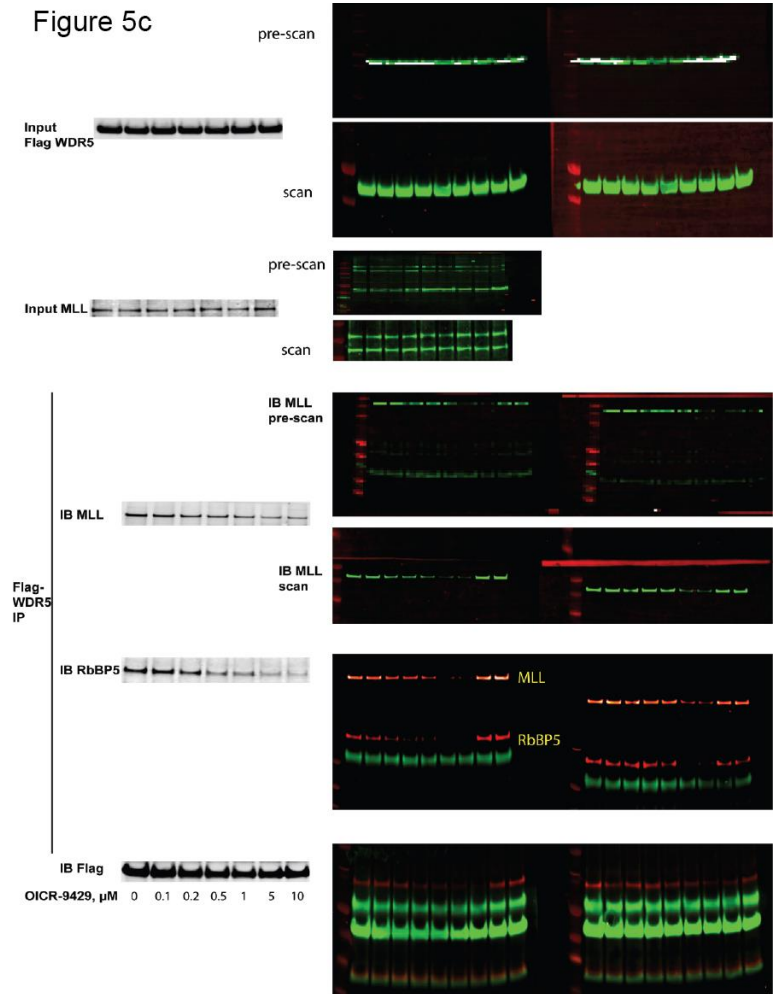



Supplementary Figure 2b

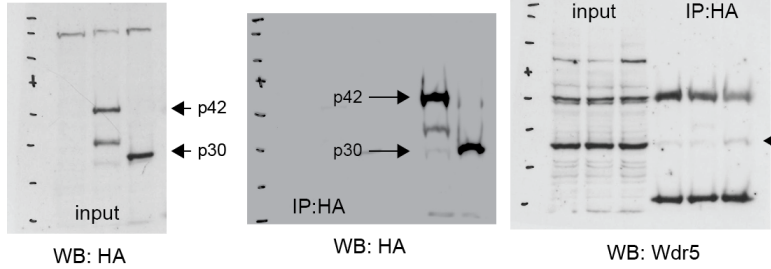

Supplementary Figure 2c

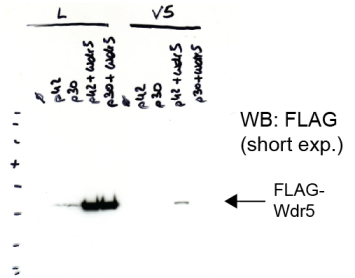

Supplementary Figure 2d

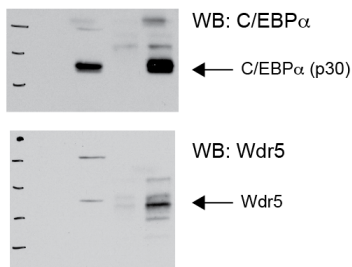

Supplementary Figure 2e

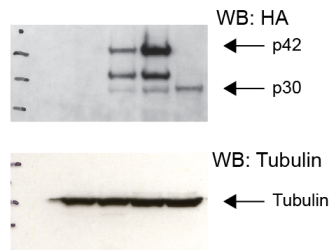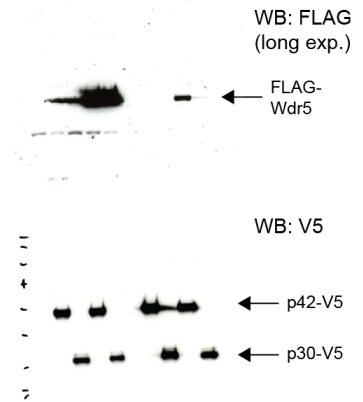

Original Gels - Supplementary Figure 2

Supplementary Figure 5c

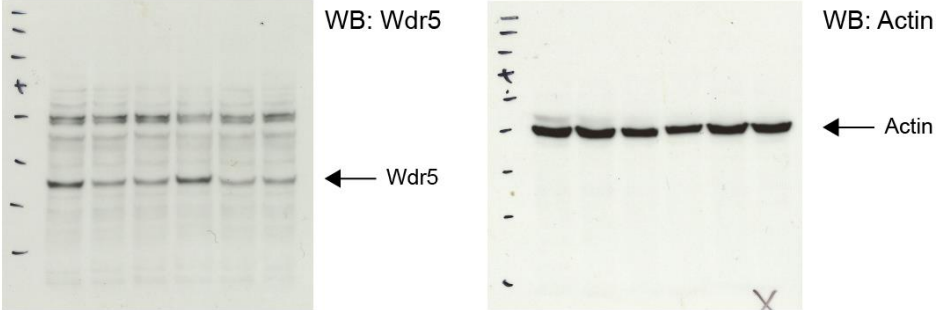

Supplementary Figure 5e

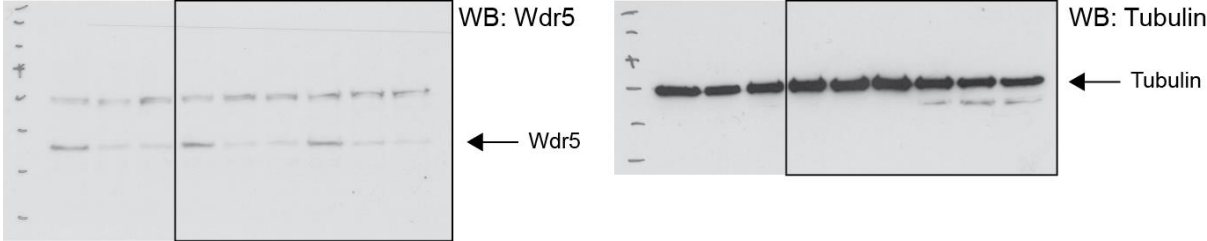

Original Gels - Supplementary Figure 5

Supplementary Figure 8a

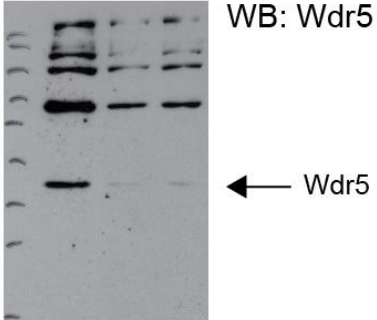

Supplementary Figure 8a+c

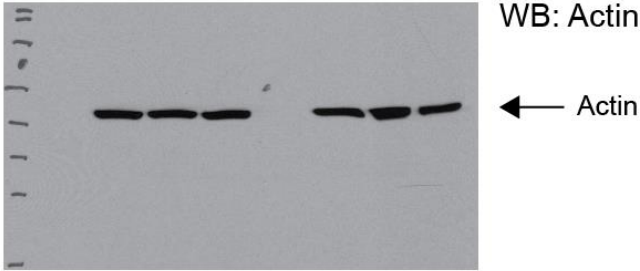

Supplementary Figure 8c

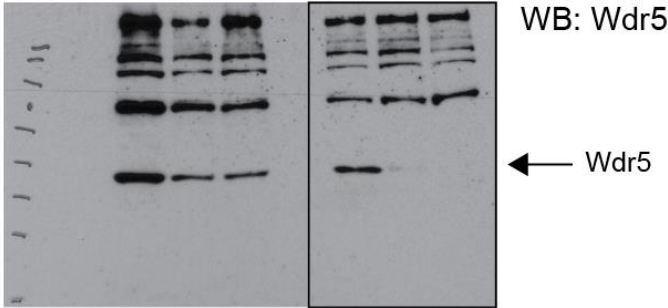

Original Gels - Supplementary Figure 8

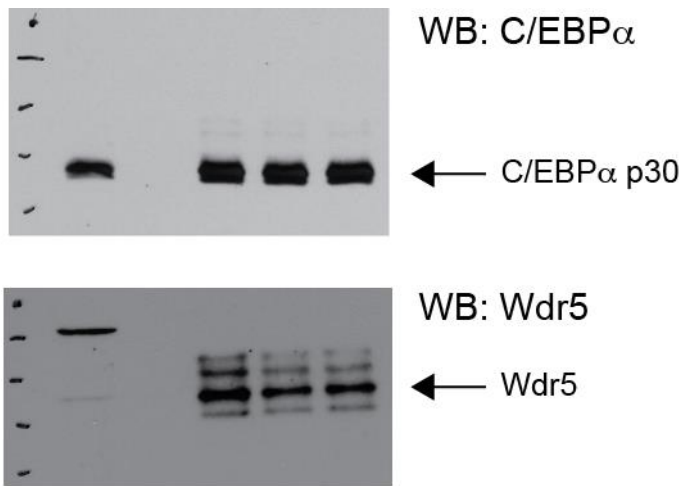

Original Gels - Supplementary Figure 13

**Pharmacological targeting of the Wdr5-MLL interaction in C/EBP $\alpha$  N-terminal leukemia**

Florian Grebien<sup>1,2\*§</sup>, Masoud Vedadi<sup>3,4\*</sup>, Matthäus Getlik<sup>5\*</sup>, Roberto Giambruno<sup>1</sup>, Amit Grover<sup>6</sup>, Roberto Avellino<sup>7</sup>, Anna Skucha<sup>1</sup>, Sarah Vittori<sup>1</sup>, Ekaterina Kuznetsova<sup>3</sup>, David Smil<sup>3</sup>, Dalia Barsyte-Lovejoy<sup>3</sup>, Fengling Li<sup>3</sup>, Gennadiy Poda<sup>5,8</sup>, Matthieu Schapira<sup>3,4</sup>, Hong Wu<sup>3</sup>, Aiping Dong<sup>3</sup>, Guillermo Senisterra<sup>3</sup>, Alexey Stukalov<sup>1</sup>, Kilian V. M. Huber<sup>1</sup>, Andreas Schönegger<sup>1</sup>, Martin Bilban<sup>9</sup>, Christoph Bock<sup>1</sup>, Peter J. Brown<sup>3</sup>, Johannes Zuber<sup>10</sup>, Keiryn L. Bennett<sup>1</sup>, Rima Al-awar<sup>4,5</sup>, Ruud Delwel<sup>7</sup>, Claus Nerlov<sup>6</sup>, Cheryl H. Arrowsmith<sup>3,11\*§</sup> and Giulio Superti-Furga<sup>1\*§</sup>

<sup>1</sup> CeMM Research Center for Molecular Medicine of the Austrian Academy of Sciences, Vienna 1090, Austria

<sup>2</sup> Ludwig Boltzmann Institute for Cancer Research, Vienna 1090, Austria

<sup>3</sup> Structural Genomics Consortium, University of Toronto, Toronto, ON, M5G 1L7, Canada

<sup>4</sup> Department of Pharmacology and Toxicology, University of Toronto, Toronto, ON, M5S 1A8, Canada

<sup>5</sup> Drug Discovery Program, Ontario Institute for Cancer Research, Toronto, ON, M5G 0A3, Canada

<sup>6</sup> MRC Molecular Hematology Unit, Weatherall Institute of Molecular Medicine, Oxford OX3 9DS, United Kingdom

<sup>7</sup> Department of Hematology, Erasmus University Medical Center, Rotterdam 3015 GE, The Netherlands

<sup>8</sup> Leslie Dan Faculty of Pharmacy, University of Toronto, Toronto, ON, M5S 3M2, Canada

<sup>9</sup> Clinical Institute of Medical and Chemical Laboratory Diagnostics, Medical University Vienna, Vienna 1090, Austria

<sup>10</sup> Research Institute of Molecular Pathology (IMP), Vienna 1030, Austria

<sup>11</sup> Princess Margaret Cancer Centre and Department of Medical Biophysics, University of Toronto, Toronto, ON, M5G 2M9, Canada

\* equal contribution

§ correspondence to

Giulio Superti-Furga: [gsuperti@cemm.oeaw.ac.at](mailto:gsuperti@cemm.oeaw.ac.at), phone: +43-1-40160-70001

Cheryl H Arrowsmith: [carrow@uhnresearch.ca](mailto:carrow@uhnresearch.ca), phone: +1-416-946-0881

Florian Grebien: [florian.grebien@lbcrlb.ac.at](mailto:florian.grebien@lbcrlb.ac.at), phone: +43-1-40160-71240

### **Chemical Synthesis - General Information**

All oxygen and/or moisture sensitive reactions were carried out under N<sub>2</sub> atmosphere in glassware purged with N<sub>2</sub> prior to use. Concentrations under reduced pressure were performed by rotary evaporation at 40 °C at the appropriate pressure, unless otherwise noted. All reagents and laboratory grade solvents were purchased from commercial vendors and used as received, without further purification. The yields given refer to chromatographically purified and spectroscopically pure compounds, unless stated otherwise. **Nuclear magnetic resonance (NMR):** <sup>1</sup>H, <sup>13</sup>C{<sup>1</sup>H}, DEPTq, COSY, HSQC and HMBC NMR spectra were recorded on a Bruker Avance-III 500 MHz spectrometer (500 MHz <sup>1</sup>H, 125 MHz <sup>13</sup>C). All <sup>1</sup>H NMR spectra were referenced relative to SiMe<sub>4</sub> through a resonance of the employed deuterated solvent or proteo impurity of the solvent; chloroform (7.26 ppm), acetone (2.05 ppm), DMSO (3.33 ppm) and methanol (3.31 ppm) for <sup>1</sup>H NMR; chloroform (77.00 ppm), acetone (29.84 ppm), DMSO (39.52 ppm) and methanol (49.00 ppm) for <sup>13</sup>C NMR<sup>5</sup>. Data are reported as follows: chemical shifts (δ), multiplicity (br = broad, s = singlet, d = doublet, t = triplet, q = quartet, m = multiplet); coupling constant(s) (J) in Hz; integration. Unless otherwise noted, NMR data were collected at 25 °C. **Flash column chromatography:** Was performed using a Biotage SP1 system fitted with a KP-SIL SNAP Silica Gel (60 Å mesh) Flash Cartridge (FSKO-1107). **Purity determination:** Was conducted by UV absorbance at 254 nm during tandem liquid chromatography/mass spectrometry (LCMS) using a Waters Acquity separations module. **Identity:** Was determined via low-resolution mass spectrometry (LRMS) conducted in positive ion mode using a Waters Acquity SQD mass spectrometer (electrospray ionization source) fitted with a PDA detector. Mobile phase A consisted of 0.1% formic acid in water, while mobile phase B consisted of 0.1% formic acid in acetonitrile.

The gradient that was followed is presented in the table:

| Time (min) | Flow (mL/min) | %A | %B |
|------------|---------------|----|----|
| initial    | 0.4           | 90 | 10 |
| 1.8        | 0.4           | 5  | 95 |
| 2.3        | 0.4           | 5  | 95 |
| 2.5        | 0.4           | 90 | 10 |
| 3          | 0.4           | 90 | 10 |
| 5          | 0             | 90 | 10 |

Column 1: Acquity UPLC CSH C18 (2.1 x 50 mm, 130Å, 1.7 µm. Part No. 186005296) or Column 2: Acquity UPLC BEH C8 (2.1 x 50 mm, 130Å, 1.7 µm. Part No. 186002877) and were used with column temperature maintained at 25 °C. The sample solution injection volume was 1 µL. **Analytical thin-layer chromatography (TLC):** Was performed on aluminum sheets, silica gel 60 F<sub>254</sub> (0.2 mm, VWR International, Darmstadt, Germany). Visualization was accomplished with UV light and aqueous potassium permanganate (KMnO<sub>4</sub>) stain followed by heating. **High-resolution mass spectrometry (HRMS):** Was conducted using a Waters Xevo quadrupole-time-of-flight (QTOF) hybrid mass spectrometer system coupled with an Acquity ultra-performance liquid chromatography (UPLC) system. **Chromatographic separations:** Were carried out on an Acquity UPLC CSH C18 (2.1 x 50 mm, 130Å, 1.7 µm. Part No. 186005296) or Column 2: Acquity UPLC BEH C8 (2.1 x 50 mm, 130Å, 1.7 µm. Part No. 186002877). The mobile phase was 0.1% formic acid in water (solvent A) and 0.1% formic acid in acetonitrile (solvent B). Leucine Enkephalin was used as lock mass. MassLynx 4.1 was used for data analysis.



### Procedure for the Preparation of OICR-9429(1)

#### **OICR-9429: N-(4-(4-Methylpiperazin-1-yl)-3'-(morpholinomethyl)-[1,1'-biphenyl]-3-yl)-6-oxo-4-(trifluoromethyl)-1,6-dihydropyridine-3-carboxamide(1)**

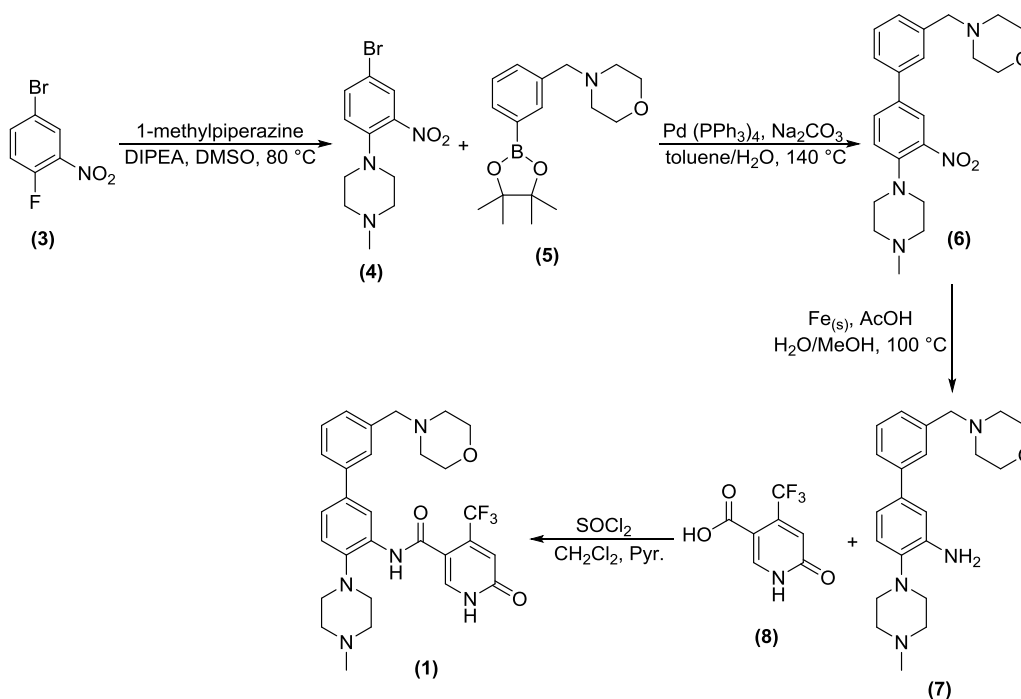

#### **1-(4-Bromo-2-nitrophenyl)-4-methylpiperazine (4)**

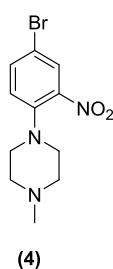

A 100 mL round bottom flask was charged with 4-bromo-1-fluoro-2-nitrobenzene (**3**) (3.4 mL, 27 mmol), 1-methylpiperazine (3.3 mL, 29 mmol), and *N,N*-diisopropylethylamine (9.2 mL, 54 mmol) in DMSO (20 mL). After 2 h at 80 °C the reaction mixture was diluted with water (50 mL) and EtOAc (50 mL), and the aqueous layer was extracted with EtOAc (3 x 50 mL). The combined organic layers were dried over MgSO<sub>4</sub>, filtered, and concentrated under reduced pressure. The residue was purified by flash column chromatography (5-30% MeOH/EtOAc) to afford 1-(4-bromo-2-nitrophenyl)-4-methylpiperazine (**4**) (7.94 g, quantitative yield). <sup>1</sup>H NMR (500 MHz, DMSO-*d*<sub>6</sub>) δ 8.00 (d, *J* = 2.4 Hz, 1H), 7.72 (dd, *J* = 2.4, 8.9 Hz, 1H), 7.26 (d, *J* = 8.9 Hz, 1H), 2.97 (t, *J* = 5.0 Hz, 4H), 2.40 (t, *J* = 4.8 Hz,

4H), 2.20 (s, 3H);  $^{13}\text{C}$  NMR (125 MHz, DMSO- $d_6$ )  $\delta$  144.3, 142.9, 136.2, 127.6, 123.4, 112.1, 54.3 (2), 50.8 (2), 45.6. HRMS (ESI)  $m/z$  calcd for  $\text{C}_{11}\text{H}_{15}\text{BrN}_3\text{O}_2$   $[\text{M}+\text{H}]^+$ : 300.0348, found: 300.0353.

#### 4-((4'-(4-Methylpiperazin-1-yl)-3'-nitro-[1,1'-biphenyl]-3-yl)methyl)morpholine (6)

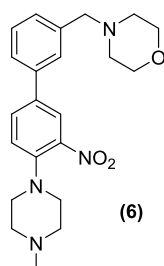

A microwave reaction vial was charged with 1-(4-bromo-2-nitrophenyl)-4-methylpiperazine (**4**) (757 mg, 2.52 mmol), 4-(3-(4,4,5,5-tetramethyl-1,3,2-dioxaborolan-2-yl)benzyl)morpholine (**5**) (1.00 g, 3.28 mmol), sodium carbonate (1.34 g, 12.6 mmol),  $\text{Pd}(\text{Ph}_3\text{P})_4$  (291 mg, 0.252 mmol) and toluene/water (1:1, 6 mL). The reaction mixture was then heated to 140 °C for 1 h in a microwave. After being cooled down to room temperature, the solution was then diluted with EtOAc (10 mL) and water (10 mL), and the aqueous layer extracted with EtOAc (3 x 10 mL). The combined organic layers were then dried over anhydrous  $\text{MgSO}_4$ , filtered and concentrated under reduced pressure. The crude product was purified by silica gel flash column chromatography (5-50 % MeOH/EtOAc) to afford 4-((4'-(4-Methylpiperazin-1-yl)-3'-nitro-[1,1'-biphenyl]-3-yl)methyl)morpholine (**6**) (772 mg, 77%).  $^1\text{H}$  NMR (500 MHz, DMSO- $d_6$ )  $\delta$  8.07 (s, 1H), 7.88 (d,  $J$  = 8.5 Hz, 1H), 7.60 (s, 1H), 7.58 (d,  $J$  = 8.0 Hz, 1H), 7.43 (t,  $J$  = 7.5 Hz, 1H), 7.39 (d,  $J$  = 8.5 Hz, 1H), 7.33 (d,  $J$  = 7.5 Hz, 1H), 3.58 (t,  $J$  = 4.0 Hz, 4H), 3.54 (s, 2H), 3.04 (t,  $J$  = 4.5 Hz, 4H), 2.45 (t,  $J$  = 4.0 Hz, 4H), 2.39 (t,  $J$  = 4.0 Hz, 4H), 2.24 (s, 3H);  $^{13}\text{C}$  NMR (125 MHz, DMSO- $d_6$ )  $\delta$  144.7, 143.5, 139.2, 138.1, 133.8, 131.9, 129.5, 128.9, 127.4, 125.5, 123.6, 122.3, 66.7 (2C), 62.8, 55.0 (2), 53.7 (2), 51.4 (2), 46.2. HRMS (ESI)  $m/z$  calcd for  $\text{C}_{22}\text{H}_{29}\text{N}_4\text{O}_3$   $[\text{M}+\text{H}]^+$ : 397.2240, found: 397.2238.

#### 4-(4-Methylpiperazin-1-yl)-3'-(morpholinomethyl)-[1,1'-biphenyl]-3-amine (7)

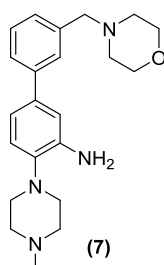

4-((4'-(4-Methylpiperazin-1-yl)-3'-nitro-[1,1'-biphenyl]-3-yl)methyl)morpholine (**6**) (772 mg, 1.95 mmol), iron powder (653 mg, 11.7 mmol), and glacial acetic acid (0.56 mL, 9.75 mmol) were dissolved in a mixture of MeOH (20 mL) and water (4 mL), and refluxed at 100 °C for 2 h. The solution was then

basified with 1M NaOH to pH = 11, diluted with brine, and extracted with EtOAc (5 x 50 mL). The combined organic layers were dried over MgSO<sub>4</sub>, filtered, and concentrated under reduced pressure. The crude product was purified by flash column chromatography (5-50% MeOH/EtOAc) to afford 4-(4-methylpiperazin-1-yl)-3'-(morpholinomethyl)-[1,1'-biphenyl]-3-amine (**7**) (620 mg, 87% yield). HRMS (ESI) *m/z* calcd for C<sub>22</sub>H<sub>31</sub>N<sub>4</sub>O [M+H]<sup>+</sup>: 366.2412, found: 366.2409.

**N-(4-(4-Methylpiperazin-1-yl)-3'-(morpholinomethyl)-[1,1'-biphenyl]-3-yl)-6-oxo-4-(trifluoromethyl)-1,6-dihydropyridine-3-carboxamide (OICR-9429) (1)**

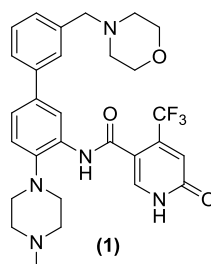

6-Hydroxy-4-(trifluoromethyl)nicotinic acid (**8**) (462 mg, 2.23 mmol) was suspended in SOCl<sub>2</sub> (6 mL) and stirred at 70 °C for 2 h until the solution went clear. Excess SOCl<sub>2</sub> was then removed under reduced pressure, and the residue dried under high vacuum for 1 h. The dried residue was subsequently dissolved in CH<sub>2</sub>Cl<sub>2</sub> (10 mL), and added dropwise to a solution of 4-(4-methylpiperazin-1-yl)-3'-(morpholinomethyl)-[1,1'-biphenyl]-3-amine (**7**) (680 mg, 1.86 mmol) and pyridine (0.21 mL, 2.60 mmol) in CH<sub>2</sub>Cl<sub>2</sub> (5 mL). After 2 h, the reaction mixture was diluted with saturated aqueous sodium bicarbonate solution (20 mL) and extracted with EtOAc (3 x 20 mL). The combined organic extracts were dried over anhydrous MgSO<sub>4</sub>, filtered, and concentrated under reduced pressure. The residue was purified by silica gel flash column chromatography (5-40% MeOH/EtOAc) to afford *N*-(4-(4-methylpiperazin-1-yl)-3'-(morpholinomethyl)-[1,1'-biphenyl]-3-yl)-6-oxo-4-(trifluoromethyl)-1,6-dihydropyridine-3-carboxamide (**1**) (207 mg, 20%). <sup>1</sup>H NMR (500 MHz, DMSO-*d*<sub>6</sub>) δ 8.25 (s, 1H), 7.99 (s, 1H), 7.61 (s, 1H), 7.54 (d, *J* = 7.7 Hz, 1H), 7.47 (dd, *J* = 1.6, 8.3 Hz, 1H), 7.40 (t, *J* = 7.6 Hz, 1H), 7.27-7.37 (m, 2H), 6.92 (s, 1H), 3.70 (t, *J* = 4.5 Hz, 4H), 3.54-3.65 (m, 2H), 3.02 (t, *J* = 4.6 Hz, 4H), 2.74 (br s, 4H), 2.51 (br. s., 4H), 2.42 (s, 3H); <sup>13</sup>C NMR (125 MHz, DMSO-*d*<sub>6</sub>) δ 163.6, 162.9, 143.2, 140.4, 140.0 (d, <sup>2</sup>*J*<sub>C-F</sub> = 33.6 Hz, 1C), 138.4, 137.5, 137.4, 132.4, 128.5, 128.3, 127.7, 125.6, 124.1, 121.2, 120.7, 119.0 (q, <sup>3</sup>*J*<sub>C-F</sub> = 5.5 Hz, 1C), 122.0 (q, <sup>1</sup>*J*<sub>C-F</sub> = 274.6 Hz, 1C), 113.3, 66.3, 62.9, 54.8 (2), 53.2, 51.0 (2), 44.4. HRMS (ESI) *m/z* calcd for C<sub>29</sub>H<sub>33</sub>F<sub>3</sub>N<sub>5</sub>O<sub>3</sub> [M+H]<sup>+</sup>: 556.2535, found: 556.2526.

### Procedure for the Preparation of OICR-0547(2)

#### **OICR-0547: N-(4-morpholino-3'-(morpholinomethyl)biphenyl-3-yl)-6-oxo-4-(trifluoromethyl)-1,6-dihydropyridine-3-carboxamide (2)**

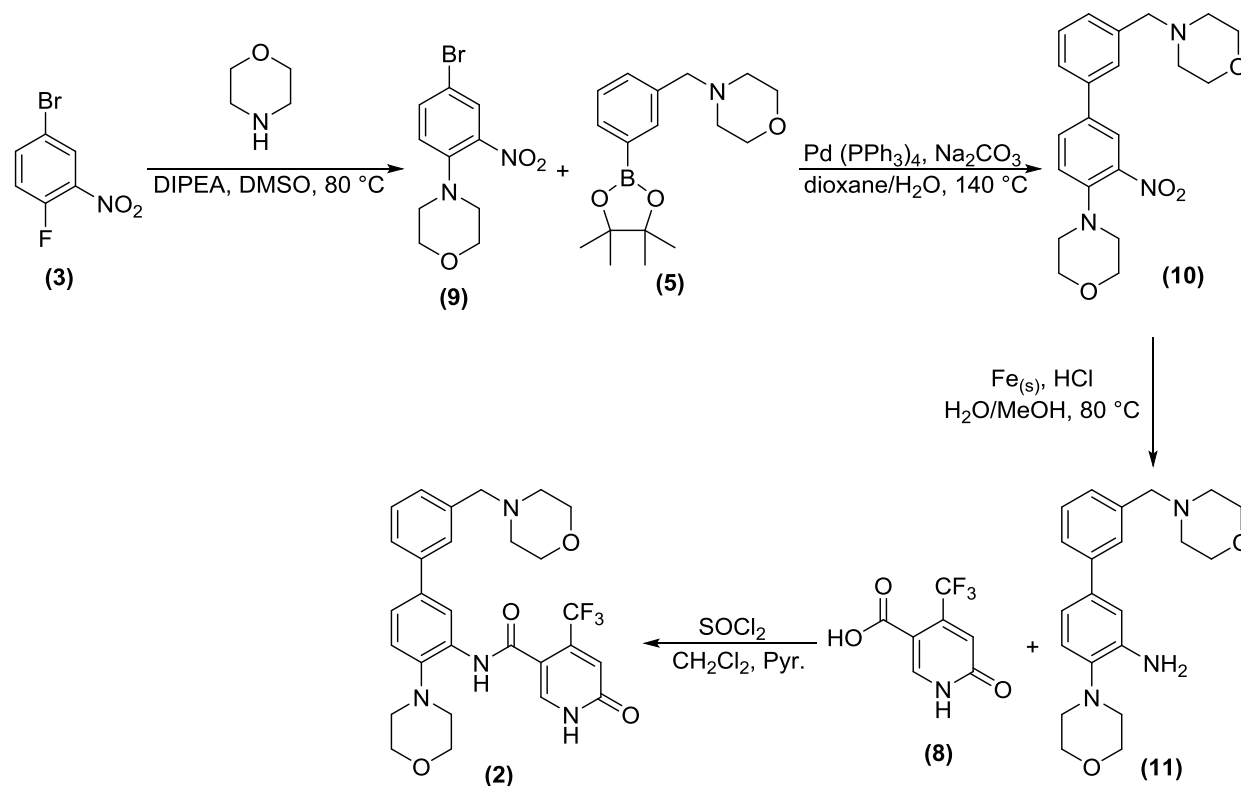

#### **4-(4-bromo-2-nitrophenyl)morpholine (9)**

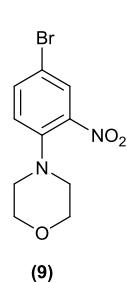

A 100 mL round bottom flask was charged with 4-bromo-1-fluoro-2-nitrobenzene (**3**) (2.80 ml, 22.32 mmol), morpholine (2.118 ml, 24.55 mmol, 1.1 equiv), and *N,N*-diisopropylethylamine (7.67 ml, 44.6 mmol, 2.0 equiv) in DMSO (13 mL). The reaction turned red and was stirred for 3 h at 80-85 °C. The reaction mixture was diluted with water (60 mL) and the aqueous layer was extracted with CH<sub>2</sub>Cl<sub>2</sub> (3 x 50 mL). The combined organic layers were dried over Na<sub>2</sub>SO<sub>4</sub>, filtered, and concentrated under reduced pressure. The product was isolated as an orange oil and was used in the next

step without further purification.

Analysis of the crude compound showed:

**Yield:** 90% (7.08 g); **<sup>1</sup>H NMR** (500 MHz, CDCl<sub>3</sub>) δ 7.90 (d, *J* = 2.3 Hz, 1H), 7.58 (dd, *J* = 8.8, 2.4 Hz, 1H), 7.03 (d, *J* = 8.8 Hz, 1H), 3.83 – 3.81 (m, 4H), 3.04 – 3.02 (m, 4H); **<sup>13</sup>C NMR** (126 MHz, CDCl<sub>3</sub>) δ 145.00, 143.85, 136.54, 128.74, 122.62, 114.13, 66.82, 52.08; **LRMS** (ESI): 287.17 (97.3%), 289.18 (100%); **UPLC:** τ = 6.9 min, column 1.

#### **4-((4'-morpholino-3'-nitrobiphenyl-3-yl)methyl)morpholine (10)**

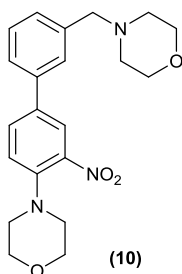

A microwave reaction vial was charged with 4-(4-bromo-2-nitrophenyl)morpholine (**9**) (2.0 g, 5.65 mmol), 4-(3-(4,4,5,5-tetramethyl-1,3,2-dioxaborolan-2-yl)benzyl)morpholine (**5**) (2.21 g, 7.06 mmol, 1.25 equiv), sodium carbonate, anhydrous (2.99 g, 28.2 mmol, 5.0 equiv), Pd(PPh<sub>3</sub>)<sub>4</sub> (0.653 g, 0.565 mmol, 0.1 equiv) and dioxane/water (1:1, 14 mL). The reaction mixture was then irradiated to 140 °C for 1.5 h in a microwave. After being cooled down to room temperature, the solution was then concentrated under reduced pressure to approx. 5-7 mL. Water

(10 mL) and CH<sub>2</sub>Cl<sub>2</sub> (10 mL) were added to the suspension, the organic layer was separated and the aqueous layer was extracted with CH<sub>2</sub>Cl<sub>2</sub> (3 x 10 mL). *Note: Sonication for 10 min was required to dissolve the white precipitate.* The combined organic layers were then dried over anhydrous Na<sub>2</sub>SO<sub>4</sub>, filtered, and concentrated under reduced pressure. The crude product was purified by silica gel flash column chromatography (Gradient: 100% to 60%, CH<sub>2</sub>Cl<sub>2</sub> : 89% CH<sub>2</sub>Cl<sub>2</sub>, 10% MeOH, 1% NH<sub>4</sub>Ac; during 40 min using KP-SIL 50 g column, product was collected at 80% of the mixture) to yield the desired product 4-((4'-morpholino-3'-nitro-[1,1'-biphenyl]-3-yl)methyl)morpholine (**10**) (2.62 g, 4.33 mmol, 77 % yield) as a red oil.

Analysis of the purified compound showed:

**Yield:** 77% (2.62 g); **<sup>1</sup>H NMR** (500 MHz, MeOD) δ 8.04 (d, J = 2.2 Hz, 1H), 7.86 (dd, J = 8.6, 2.2 Hz, 1H), 7.70 (s, 1H), 7.62 (d, J = 7.7 Hz, 1H), 7.48 (t, J = 7.6 Hz, 1H), 7.41 (d, J = 7.6 Hz, 1H), 7.38 (d, J = 8.6 Hz, 1H), 3.85 (s, 2H), 3.83 – 3.79 (m, 5H), 3.79 – 3.74 (m, 4H), 3.09 – 3.06 (m, 4H), 2.75 (s, 4H); **<sup>13</sup>C NMR** (126 MHz, MeOD) δ 146.03, 145.66, 140.17, 136.26, 132.73, 130.70, 130.46, 129.40, 127.58, 124.60, 123.05, 67.95, 66.86, 63.53, 54.16, 53.23; **LRMS** (ESI): 384.30; **UPLC**: τ = 0.95 min, column 1.

#### 4-morpholino-3'-(morpholinomethyl)biphenyl-3-amine (11)

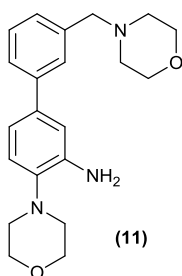

In a 100 mL flask 4-((4'-morpholino-3'-nitro-[1,1'-biphenyl]-3-yl)methyl)morpholine (**10**) (2.62 g, 4.33 mmol), iron powder (1.210 g, 21.66 mmol, 5.0 equiv) and hydrochloric acid (0.036 ml, 0.433 mmol, 0.1 equiv) were dissolved in methanol/water (1:1, 10 mL) and heated at 80-90 °C for 3 h. *Note 1: the stirring was set to the maximum possible to avoid clump formation. Note 2: the product decomposes at high temperature, do not exceed 90 °C.* The solution was filtered through celite, and rinsed with CH<sub>2</sub>Cl<sub>2</sub> (2 X 15 mL). The brown solution was then

basified with 1M NaOH to pH = 11-10, diluted with brine, and extracted with CH<sub>2</sub>Cl<sub>2</sub> (5 x 30 mL). The combined organic layers were dried over MgSO<sub>4</sub>, filtered, and concentrated under reduced pressure. *Note 3: concentration under reduced pressure was performed by rotary evaporation at 30 °C.* The crude product was purified by flash column chromatography (Gradient: 100% to 50%, CH<sub>2</sub>Cl<sub>2</sub> : 89% CH<sub>2</sub>Cl<sub>2</sub>, 10% MeOH, 1% NH<sub>4</sub>Ac; during 60 min using KP-SIL 50 g column, product was collected at 70% of the mixture) to afford 982.22 mg of a white solid.

Analysis of the purified compound showed:

**Yield:** 57.3% yield (0.982 g); **<sup>1</sup>H NMR** (500 MHz, CDCl<sub>3</sub>) δ 7.60 (dd, J = 12.0, 7.2 Hz, 3H), 7.47 (td, J = 7.4, 1.1 Hz, 2H), 7.39 (td, J = 7.5, 2.7 Hz, 4H), 7.28 (t, J = 7.5 Hz, 1H), 6.99 (d, J = 8.2 Hz, 1H), 6.95 – 6.89 (m, 2H), 3.98 (s, 2H), 3.83 – 3.76 (m, 4H), 3.65 (s, 4H), 3.48 (s, 2H), 2.93 – 2.85 (m, 4H), 2.40 (s, 4H); **<sup>13</sup>C NMR** (126 MHz, CDCl<sub>3</sub>) δ 141.82, 138.59, 133.19, 132.37, 132.29, 132.21, 132.06, 132.04, 128.71, 128.68, 128.58, 127.97, 120.16, 117.71, 114.13, 67.81, 67.14, 63.66, 53.77, 51.68; **LRMS** (ESI): 354.46; UPLC: τ = 0.78 min, column 1.

***N*-(4-morpholino-3'-(morpholinomethyl)biphenyl-3-yl)-6-oxo-4-(trifluoromethyl)-1,6-dihydropyridine-3-carboxamide (2)**

*Note 1: Prior to the experiment, 6-Hydroxy-4-(trifluoromethyl)nicotinic acid (8) and (11) were dried under high vacuum for 24 h.*

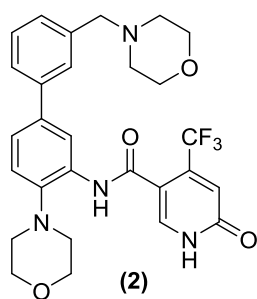

The 6-hydroxy-4-(trifluoromethyl)nicotinic acid (**8**) (0.617 g, 2.98 mmol, 1.2 equiv) was suspended in SOCl<sub>2</sub> (8.10 ml, 112 mmol, 45 equiv) to form a white slurry. The slurry was stirred at 70 °C for 2 h until the solution went clear. The remaining SOCl<sub>2</sub> was removed under reduced pressure, and the residue dried under high vacuum for 1 h. *Note 2: A trap filled with KOH was used to neutralize the HCl<sub>gas</sub> generated.* The dried residue was subsequently dissolved in CH<sub>2</sub>Cl<sub>2</sub><sub>anhyd</sub> (10 mL), and added drop wise over 20-30 min to a solution of **11** (0.98222 g, 2.481 mmol) and pyridine<sub>anhyd</sub> (0.300 ml, 3.72 mmol, 1.5 equiv) in CH<sub>2</sub>Cl<sub>2</sub> (5 mL). After 16 h, the reaction mixture was diluted with saturated aqueous sodium bicarbonate solution (20 mL) and extracted with CH<sub>2</sub>Cl<sub>2</sub> (3 x 20 mL) *Note 3: Sonication was necessary to dissolve the black solid formed.* The combined organic extracts were dried over anhydrous Na<sub>2</sub>SO<sub>4</sub>, filtered, and concentrated under reduced pressure. The residue was purified by silica gel flash column chromatography (Gradient: 70% to 20%, CH<sub>2</sub>Cl<sub>2</sub>: 89% CH<sub>2</sub>Cl<sub>2</sub>, 10% MeOH, 1% NH<sub>4</sub>Ac; during 60 min using KP-SIL 50 g column, product was collected at 40% of the mixture, tailing was observed) to afford the title compound (**2**) as a white solid.

Analysis of the purified compound showed:

**Yield:** 8.57% yield (0.119 g); **<sup>1</sup>H NMR** (500 MHz, MeOD) δ 8.26 (d, J = 1.2 Hz, 1H), 7.96 (s, 1H), 7.61 (s, 1H), 7.53 (d, J = 7.8 Hz, 1H), 7.46 (dd, J = 8.3, 2.0 Hz, 1H), 7.39 (t, J = 7.6 Hz, 1H), 7.33 - 7.28 (m, 2H), 6.92 (s, 1H), 3.84 - 3.81 (m, 4H), 3.70 - 3.67 (m, 4H), 3.58 (s, 2H), 2.95 - 2.90 (m, 4H), 2.49 (s, 4H); **<sup>13</sup>C NMR** (126 MHz, MeOD) δ 164.90, 164.18, 144.81, 141.79, 141.39 (q, J<sup>2</sup>[<sup>13</sup>C-<sup>19</sup>F] = 33.2 Hz), 139.67, 138.87, 138.78, 133.85, 129.89, 129.66, 129.09, 126.99, 126.67, 125.44, 124.49, 123.40 (q, J<sup>1</sup>[<sup>13</sup>C-<sup>19</sup>F] = 274.6 Hz), 122.53, 122.04, 120.43 (q, J<sup>3</sup>[<sup>13</sup>C-<sup>19</sup>F] = 11.0, 5.6 Hz), 114.71, 68.23, 67.70, 64.29, 54.63, 53.58. **<sup>19</sup>F NMR** (471 MHz, MeOD) δ -63.80; **LRMS** (ESI): 543.49; UPLC: τ = 0.92 min, column 2.
